1  
2  
3  
4  
5  
6  
7  
8  
9  
10  
11  
12  
13  
14  
15  
16  
17  
18  
19  
20  
21  
22  
23  
24  
25

**Characterization of a  $\beta$ -lactamase that contributes to intrinsic  
 $\beta$ -lactam resistance in *Clostridioides difficile***

Brindar K. Sandhu<sup>a</sup>, Adrienne N. Edwards<sup>a</sup>, Sarah E. Anderson<sup>a</sup>, Emily C. Woods<sup>a</sup>,  
and Shonna M. McBride<sup>a#</sup>

<sup>a</sup>Department of Microbiology and Immunology, Emory University School of Medicine, Emory  
Antibiotic Resistance Center, Atlanta, GA, USA.

Running Title: *blaD* induction in *Clostridioides difficile*

Key Words: *Clostridium difficile*, *Clostridioides difficile*, beta-lactamase, beta-lactam  
resistance, blaRI, antibiotic resistance

#Address correspondence to Shonna M. McBride, [shonna.mcbride@emory.edu](mailto:shonna.mcbride@emory.edu)

26 **ABSTRACT**

27 *Clostridioides difficile* causes severe antibiotic-associated diarrhea and colitis. *C. difficile* is an  
28 anaerobic, Gram-positive spore former that is highly resistant to  $\beta$ -lactams, the most commonly  
29 prescribed antibiotics. The resistance of *C. difficile* to  $\beta$ -lactam antibiotics allows the pathogen to  
30 replicate and cause disease in antibiotic-treated patients. However, the mechanisms of  $\beta$ -lactam  
31 resistance in *C. difficile* are not fully understood. Our data reinforce prior evidence that *C.*  
32 *difficile* produces a  $\beta$ -lactamase, which is a common  $\beta$ -lactam resistance mechanism found in  
33 other bacterial species. We identified an operon encoding a lipoprotein of unknown function and  
34 a  $\beta$ -lactamase that was greatly induced in response to several classes of  $\beta$ -lactam antibiotics.  
35 An in-frame deletion of the operon abolished  $\beta$ -lactamase activity in *C. difficile* strain 630 $\Delta$ *erm*  
36 and resulted in decreased resistance to the  $\beta$ -lactam ampicillin. We found that the activity of this  
37  $\beta$ -lactamase, herein named BlaD, is dependent upon the redox state of the enzyme. In addition,  
38 we observed that transport of BlaD out of the cytosol and to the cell surface is facilitated by an  
39 N-terminal signal sequence. Our data demonstrate that a co-transcribed lipoprotein, BlaX, aids  
40 in BlaD activity. Further, we identified a conserved BlaRI regulatory system and demonstrated  
41 via insertional disruption that BlaRI controls transcription of the *blaXD* operon in response to  $\beta$ -  
42 lactams. These results provide support for the function of a  $\beta$ -lactamase in *C. difficile* antibiotic  
43 resistance, and reveal the unique roles of a co-regulated lipoprotein and reducing environment  
44 in  $\beta$ -lactamase activity.

45

46 **IMPORTANCE**

47 *Clostridioides difficile* is an anaerobic, gastrointestinal human pathogen. One of the highest risk  
48 factors for contracting *C. difficile* infection is antibiotic treatment, which causes microbiome  
49 dysbiosis. *C. difficile* is resistant to  $\beta$ -lactam antibiotics, the most commonly prescribed class of  
50 antibiotics. *C. difficile* produces a recently discovered  $\beta$ -lactamase, which cleaves and  
51 inactivates numerous  $\beta$ -lactams. In this study, we report the contribution of this anaerobic  $\beta$ -

52 lactamase to ampicillin resistance in *C. difficile*, as well as the transcriptional regulation of the  
53 gene, *blaD*, by a BlaRI system. In addition, our data demonstrate co-transcription of *blaD* with  
54 *blaX*, which encodes a membrane protein of previously unknown function. Furthermore, we  
55 provide evidence that BlaX enhances  $\beta$ -lactamase activity in a portion of *C. difficile* strains. This  
56 study demonstrates a novel interaction between a  $\beta$ -lactamase and a membrane protein in a  
57 Gram-positive pathogen, and due to the anaerobic nature of the  $\beta$ -lactamase activity, suggests  
58 that more  $\beta$ -lactamases are yet to be identified in other anaerobes.

59

## 60 INTRODUCTION

61 *Clostridioides difficile*, or *C. difficile*, is an anaerobic, Gram-positive, spore-forming bacterial  
62 pathogen that causes antibiotic-associated diarrhea (1-3). *C. difficile* infection, or CDI, can be  
63 severe, resulting in pseudomembranous colitis, intestinal rupture, and death. The Center for  
64 Disease Control (CDC) estimates that almost half a million people in the U.S. suffer from CDI  
65 per year, resulting in approximately 29,000 deaths per year (4). As a result, CDI cases add  
66 approximately \$4.8 billion per year to U.S. healthcare costs (5). *C. difficile* was first linked to  
67 antibiotic-associated diarrhea in 1978, and antibiotic treatment is still one of the highest risk  
68 factors for CDI (2, 3). Antibiotic treatment results in gastrointestinal dysbiosis, eliminating  
69 important indigenous anaerobes, thereby allowing for *C. difficile* population expansion (6, 7).  
70 Antibiotic treatment of CDI is limited to the use of vancomycin, fidaxomicin, or metronidazole,  
71 due to the high resistance *C. difficile* exhibits for a wide array of antibiotics (8-10).

72 The most commonly prescribed class of antibiotics are the  $\beta$ -lactams, which comprise  
73 62% of all prescribed antibiotics in the United States and are strongly associated with *C. difficile*  
74 infections (11-13).  $\beta$ -lactams are inhibitors of bacterial cell wall synthesis and are characterized  
75 by a four-membered core lactam ring (14).  $\beta$ -lactams are further classified into four groups  
76 based on adjoining structures: the penicillins, cephalosporins, monobactams, and carbapenems  
77 (15). All  $\beta$ -lactam antibiotics bind to, and thus disable, cell-wall synthesizers called penicillin-

78 binding proteins (PBPs) of bacteria (16, 17). Since the introduction of  $\beta$ -lactams into modern  
79 medicine, multiple mechanisms of resistance to these antibiotics have been discovered in a  
80 variety of bacterial species.  $\beta$ -lactam resistance mechanisms include the production of  $\beta$ -  
81 lactamases, which hydrolyze the  $\beta$ -lactam ring and render the antibiotic ineffective, mutations  
82 acquired in PBPs that prevent binding of the  $\beta$ -lactams, reduced outer membrane permeability  
83 due to reduced porin expression, and efflux pumps, which prevent the antibiotic from reaching  
84 the cell wall (18-23).

85         The most common mechanism of  $\beta$ -lactam resistance occurs through the production of  
86  $\beta$ -lactamase enzymes. Most of the characterized  $\beta$ -lactamases have been identified in Gram-  
87 negative species; in these bacteria, the  $\beta$ -lactamase is generally secreted into the periplasm,  
88 where the enzyme is concentrated, allowing for high levels of  $\beta$ -lactam resistance (24). Less  
89 common are the outer membrane-anchored  $\beta$ -lactamases, which may be further packaged into  
90 outer membrane vesicles, enabling the inactivation of nearby  $\beta$ -lactams (25-27).  $\beta$ -lactam  
91 resistance in Gram-positive bacteria, however, is more commonly conferred by the modification  
92 of the intended targets of the  $\beta$ -lactam, the penicillin-binding proteins (28). Still,  $\beta$ -lactamases do  
93 exist in Gram-positive bacteria (29-33). Although Gram-positive bacteria lack a periplasmic  
94 space, some species do produce membrane-bound  $\beta$ -lactamases (29, 34-37). A few of these  
95 enzymes are proteolytically cleaved, producing an exoenzyme that can be released from the  
96 membrane (31, 36, 38).

97          $\beta$ -lactamase enzymes are classified into four classes: A, B, C, and D. Classes A, C, and  
98 D are serine hydrolases, while class B  $\beta$ -lactamases are metallohydrolases (18). Whereas  $\beta$ -  
99 lactamases of all classes have been discovered in Gram-negative bacteria, most Gram-positive  
100  $\beta$ -lactamases belong to classes A or B (32). Class D  $\beta$ -lactamases were recently identified in  
101 Gram-positive bacteria, including one that is highly conserved among *C. difficile* isolates (33,  
102 39). A recent study demonstrated that a  $\beta$ -lactamase in *C. difficile* confers resistance to the  
103 penicillin, cephalosporin, and monobactam class of  $\beta$ -lactams (39). According to the substrate

104 profile of this enzyme, this  $\beta$ -lactamase belongs to the 2de functional group of  $\beta$ -lactamases  
105 (39, 40). The purpose of our study was to characterize the genetic organization, resistance  
106 contributions, biochemical activity, and regulation of the *C. difficile*  $\beta$ -lactamase. To accomplish  
107 this, we deleted the genes encoding the  $\beta$ -lactamase and the upstream predicted membrane  
108 protein in *C. difficile*, and examined the resulting resistance profiles and biochemical activity.  
109 Notably, we observed that the *C. difficile*  $\beta$ -lactamases are inactivated by oxygen, which has not  
110 been described for other class D  $\beta$ -lactamases. We also examined how this  $\beta$ -lactamase  
111 enzyme is transported, and detail its mechanism of regulation. We demonstrate that unlike other  
112 described  $\beta$ -lactamases, the *C. difficile*  $\beta$ -lactamase is co-transcribed with a membrane protein  
113 that facilitates  $\beta$ -lactamase processing and function. These results further our understanding of  
114  $\beta$ -lactam resistance in *C. difficile*, which may expose approaches to prevent or treat  $\beta$ -lactam-  
115 associated CDI.

116

## 117 **MATERIALS AND METHODS**

### 118 **Bacterial strains and growth conditions**

119 Bacterial strains and plasmids used in this study are listed in **Table 1**. *Escherichia coli* was  
120 grown at 37°C in LB medium with 100  $\mu$ g/mL ampicillin (Sigma-Aldrich) and 20  $\mu$ g/mL  
121 chloramphenicol (Sigma-Aldrich) when necessary (41). *C. difficile* was grown anaerobically at  
122 37°C as previously described (42) in brain heart infusion medium supplemented with 2% yeast  
123 extract (BHIS; Becton Dickinson Company) or Mueller Hinton Broth (MHB; Difco) with 2  $\mu$ g/mL  
124 thiamphenicol (Sigma-Aldrich), 3.125 – 60  $\mu$ g/mL cefoperazone (Sigma-Aldrich), 0.25 – 2  $\mu$ g/mL  
125 ampicillin, 0.125 – 1.5  $\mu$ g/mL imipenem (US Pharmacopeia), 0.75  $\mu$ g/mL vancomycin (Sigma-  
126 Aldrich), 75  $\mu$ g/mL polymyxin B (Sigma-Aldrich), 1 mg/mL lysozyme (Fisher Scientific), 7.5  
127  $\mu$ g/mL nisin (MP Biomedicals), 2  $\mu$ g/mL LL-37 (Anaspec), or 250  $\mu$ g/mL kanamycin (Sigma-  
128 Aldrich) when specified.

129

130 **Strain and plasmid construction**

131 The oligonucleotide primers used in this study are listed in **Table 2**. Primer design and the  
132 template for PCR reactions were based on *C. difficile* strain 630 (GenBank accession  
133 NC\_009089.1), except for pMC896, which was based on strain M120 (GenBank accession  
134 FN665653.1).

135 The *blaX::erm* and *blaI::erm* mutant strains were created by retargeting the Group II  
136 intron from pCE240 with the primers listed in **Table 2**, as previously described (43). To generate  
137 insertional disruptions, transconjugants were selected on 5 µg/mL erythromycin (Sigma-Aldrich),  
138 and 50 µg/mL kanamycin (Sigma-Aldrich) to select against *E. coli*.

139 The  $\Delta blaXD$  mutant strain was created using a pseudo-suicide plasmid technique, as  
140 described previously, with slight variation (44). Briefly, 500 bp regions homologous to the 5' and  
141 3' ends of the *bla* operon were amplified and Gibson assembled into the *PmeI* site of plasmid  
142 pMTLSC7215 to create plasmid pMC822. The plasmid was purified using a miniprep kit (Zymo  
143 Research), transformed into *E. coli* strain HB101 pRK24, and introduced into *C. difficile* by  
144 conjugation. *C. difficile* harboring the plasmid were selected on BHIS agar containing 15 µg/mL  
145 thiamphenicol, streaked onto BHIS agar, and subsequently on BHIS agar with 15 µg/mL  
146 thiamphenicol and 100 µg/mL kanamycin to force plasmid integration and counterselect against  
147 *E. coli*. A clone that screened positive for two crossover events was streaked to purity on BHIS  
148 agar for three more passages and the loss of plasmid was confirmed via sensitivity to 5 µg/mL  
149 thiamphenicol on BHIS agar.

150 Detailed construction of plasmids can be found in **Figure S1**. Plasmids were transferred  
151 to *C. difficile* as previously described, with slight variation (45, 46). Briefly, plasmids were  
152 chemically transformed into *E. coli* strain HB101 pRK24 and mated with *C. difficile* on agar  
153 plates for 48 h. Transconjugants were selected on BHIS agar containing 10 µg/mL  
154 thiamphenicol for plasmid selection and 100 µg/mL kanamycin to counterselect against *E. coli*.

155

156 **Nitrocefin hydrolysis disk assays**

157  $\beta$ -lactamase activity was assessed by hydrolysis of nitrocefin, a chromogenic cephalosporin  
158 (Sigma-Aldrich). Briefly, *C. difficile* was grown overnight in BHIS to log phase, then diluted to an  
159 OD<sub>600</sub> of 0.05 in BHIS medium with or without 2  $\mu$ g/mL ampicillin. Cultures were grown to an  
160 OD<sub>600</sub> of 0.45-0.55, and 1 mL of culture was collected and centrifuged for 3 minutes at 21,130  
161 rcf. All but approximately 30  $\mu$ L of the supernatant was decanted, the pellets were resuspended,  
162 and the cells were spotted onto a nitrocefin disk. The disks were incubated aerobically or  
163 anaerobically for 2 h at 37°C, as noted.

164

165 **Nitrocefin liquid hydrolysis assays**

166  $\beta$ -lactamase activity was determined for complemented strains via anaerobic liquid nitrocefin  
167 assays, as previously reported, with some modifications (47). Briefly, *C. difficile* was grown  
168 overnight in BHIS with 2  $\mu$ g/mL thiamphenicol to log phase, then diluted to an OD<sub>600</sub> of 0.05 in  
169 BHIS medium with 2  $\mu$ g/mL thiamphenicol and 2  $\mu$ g/mL ampicillin. Cultures were grown to an  
170 OD<sub>600</sub> of 0.45 – 0.55, 1 mL of culture was collected (in duplicate), and cells centrifuged for 3 min  
171 at 21,130 rcf. For whole cell reactions, supernatant was transferred to a fresh tube, and  
172 nitrocefin (BioVision) was added to supernatant or whole cell suspensions at a final  
173 concentration of 50  $\mu$ M. For lysed cell reactions, pelleted cells were frozen at -20°C until use.  
174 Pellets were resuspended in lysis buffer (100 mM sodium phosphate + 50 mM sodium  
175 bicarbonate, pH 7.4), and DTT (Fisher Scientific) was added to each sample for a final  
176 concentration of 0.2 mM. Lysed samples were subjected to six freeze-thaw cycles (2 min in dry  
177 ice/Ethanol bath, 3 min at 37°C). 0.2 mL of the lysate was transferred to a fresh tube  
178 (designated 'lysate'). The remaining volumes of samples were pelleted by centrifugation for 30  
179 min at 21,130 rcf at 4°C, and then filtered via 0.22  $\mu$ m syringe filters (BD Biosciences). 0.2 mL  
180 of this solution (designated 'lysate filtrate') was transferred to a fresh tube. Equal volumes of  
181 lysis buffer were added to each sample. Nitrocefin was added at a final concentration of 50  $\mu$ M

182 to bring the sample volume to 1 mL and samples were incubated anaerobically at 37°C for up to  
183 7 minutes. Reactions were quenched by adding 100  $\mu$ L of 1 M NaCl and immediately placed on  
184 ice. Samples were centrifuged for 3 min at 21,130 rcf to clear cell debris. The entire assay was  
185 performed anaerobically until this point. 300  $\mu$ L of each supernatant was applied to a 96-well  
186 flat-bottom plate, and the OD<sub>490</sub> was recorded with a BioTek microplate reader.  $\beta$ -lactamase  
187 units were calculated by the following equation:  $(OD_{490} * 1000) / (OD_{600} * \text{time in min} * \text{vol of}$   
188  $\text{cells in mL})$ , where OD<sub>600</sub> is the value at the time of collection and the time is the number of  
189 minutes between the addition of nitrocefin and adding 1 M NaCl. Lysate results were normalized  
190 to the amount of lysate supernatant used. Time course experiments were run to confirm the  
191 linearity of the reaction. Results reported are the mean of at least three independent  
192 experiments.

193

#### 194 **Minimal Inhibitory Concentration determination (MIC)**

195  $\beta$ -lactam susceptibility of *C. difficile* was determined as described previously (48). Briefly, active  
196 *C. difficile* cultures were diluted in Mueller Hinton Broth (MHB; BD Difco) to an OD<sub>600</sub> of 0.1,  
197 which were grown to an OD<sub>600</sub> of 0.45, and further diluted 1:10 in MHB. 15  $\mu$ L of this diluted  
198 culture ( $\sim 5 \times 10^5$  CFU/mL) was plated in a pre-reduced 96-well round bottom polystyrene plate  
199 that contained 135  $\mu$ L of MHB with appropriate  $\beta$ -lactams in each well. The MIC was determined  
200 as the concentration at which there was no visible growth after 24 hours of anaerobic incubation  
201 at 37°C.

202

#### 203 **Alkaline phosphatase activity assays**

204 Alkaline phosphatase activity assays in *C. difficile* were performed as described previously, with  
205 minor modifications to the original published assay (49, 50). Briefly, *C. difficile* cultures were  
206 grown anaerobically at 37 °C overnight in BHIS with thiamphenicol (2  $\mu$ g/mL) to log phase, then  
207 diluted to an OD<sub>600</sub> of 0.05 in 10 mL BHIS with thiamphenicol. 1 mL of cells was collected in



208 duplicate when the OD<sub>600</sub> reached 0.5. Cells were centrifuged at 21,130 rcf for 3 min and the  
209 pellets were stored in -20°C at least overnight. For the assay, cell pellets were thawed and  
210 resuspended in 500 µL of cold wash buffer (10 mM Tris pH 8.0 + 10 mM MgSO<sub>4</sub>) and pelleted  
211 for 3 min at 21,130 rcf. Alkaline phosphatase assays were performed as previously described  
212 (50) without the addition of chloroform (51). The OD<sub>550</sub> (cell debris) and OD<sub>420</sub> (pNP cleavage)  
213 were measured in a BioTek microplate reader. Values were averaged between the triplicate  
214 wells, and then between duplicate technical samples. AP units were calculated as  $((OD_{420} -$   
215  $(1.75 * OD_{550})) * 1000) / (OD_{600} * \text{time})$ , where OD<sub>600</sub> is the value at the time of collection. Results  
216 reported are the average between three independent experiments.

217

### 218 **Quantitative reverse transcription PCR analysis (qRT-PCR)**

219 Actively growing *C. difficile* were diluted to an OD<sub>600</sub> of 0.02 in 10 – 25 mL BHIS with appropriate  
220 antibiotic and grown to log phase. RNA was isolated as described previously (45, 52). Briefly, 3  
221 mL samples were taken at an OD<sub>600</sub> of 0.45 – 0.55, mixed with 3 mL ice-cold 1:1  
222 acetone:ethanol, and stored immediately in -80°C. RNA was isolated (Qiagen RNeasy kit),  
223 treated for contaminating DNA (Invitrogen TURBO DNA-free kit), and RNA was reverse-  
224 transcribed into cDNA (Bioline Tetro cDNA synthesis kit). cDNA samples were used for qPCR  
225 (Bioline SensiFAST SYBR and Fluorescein kit) in technical triplicates on a Roche Lightcycler 96  
226 as described previously (53). Results are presented as the means and standard errors of the  
227 means for three biological replicates. Statistical significance was determined using a one-way  
228 ANOVA, followed by Dunnett's multiple-comparison test (GraphPad Prism v6.0).

229

## 230 **RESULTS**

### 231 ***C. difficile* produces an inducible, anaerobic β-lactamase.**

232 *C. difficile* was recently reported to produce a β-lactamase that can cleave β-lactam  
233 antibiotics (39). We further investigated the regulation and potential inducibility of *C. difficile* β-

234 lactamase activity and examined the environmental conditions required for its function. Two  
235 diverse strains of *C. difficile*, 630 $\Delta$ *erm* (ribotype 012) and R20291 (ribotype 027), were grown in  
236 the presence or absence of cefoxitin, a cephalosporin, and applied to a membrane disk  
237 impregnated with nitrocefin, a chromogenic cephalosporin. As shown in **Figure 1**, both strains of  
238 *C. difficile* grown in the presence of cefoxitin caused a color change from yellow to red,  
239 indicating cleavage of nitrocefin. In the absence of cefoxitin, neither strain demonstrated  
240 observable nitrocefin cleavage. These results suggested that *C. difficile* produces a  $\beta$ -lactamase  
241 that is inducible by  $\beta$ -lactams and is present in diverse strains. During optimization of these  
242 assays, we observed markedly higher  $\beta$ -lactamase activity under anaerobic conditions,  
243 suggesting that this activity was impaired by oxygen. Indeed, when the nitrocefin assay was  
244 performed in the presence of oxygen, the disk did not change color, indicating a loss of  $\beta$ -  
245 lactamase activity. These results demonstrate that *C. difficile* strains produce an inducible  $\beta$ -  
246 lactamase, and that the activity of this enzyme is quenched by oxygen.

247

#### 248 **CD0458 encodes the putative class D $\beta$ -lactamase, BlaD**

249 Based on the observed induction of  $\beta$ -lactamase activity, we hypothesized that the  
250 expression of one or more putative  $\beta$ -lactamases would be induced upon exposure to  $\beta$ -  
251 lactams. To test this, *C. difficile* strain 630 $\Delta$ *erm* was grown in the presence of three classes of  
252  $\beta$ -lactams: cefoperazone (a cephalosporin), ampicillin (a penicillin), and imipenem (a  
253 carbapenem). Using qRT-PCR, we measured the gene expression for 17 putative  $\beta$ -lactamases  
254 identified in the *C. difficile* genome (8, 54, 55). **Figure S2** demonstrates that the expression of  
255 only one of these genes, *CD0458*, was significantly induced upon exposure to each of the three  
256 types of  $\beta$ -lactams. This result supports a previously reported hypothesis, as *CD0458* was  
257 recently identified as a  $\beta$ -lactamase in *C. difficile* (39). This induction suggested that expression  
258 of *CD0458* confers the  $\beta$ -lactamase activity that we previously observed. The expression of the  
259 homologous gene in *C. difficile* strain R20291 was also greatly induced by these three  $\beta$ -

260 lactams (CDR20291\_0399, 99% identity; **Figure S2**). *CD0458* is analogous to two loci  
261 described recently by Toth *et al.* as *cdd1* and *cdd2* (39). However, based on the high similarity  
262 of the previously described Cdd1 and Cdd2 proteins, the existence of other genes already  
263 annotated as *cdd*, *cdd2*, and *cdd3* in strain 630 (56, 57), and the sequence similarity of the  
264 CD0458/CDR20291\_0399 proteins to class D  $\beta$ -lactamases, we renamed the locus *blaD*.

265

266 **CD0457 encodes a putative membrane protein, BlaX, which is co-transcribed with *blaD***

267       Analysis of the region surrounding *blaD* revealed the presence of another gene,  
268 *CD0457*, which appeared to be part of an operon with *blaD*. **Figure 2A** illustrates the putative  
269 *bla* operon, in which *CD0457* is located 27 nucleotides upstream of the start codon of *CD0458*.  
270 To determine if expression of *CD0457* is similarly induced upon  $\beta$ -lactam exposure, we  
271 measured transcription of *CD0457* in *C. difficile* strain 630 $\Delta$ *erm* upon exposure to  
272 cefoperazone, ampicillin, and imipenem. **Figure 2B** demonstrates that expression of *CD0457* is  
273 comparably induced upon exposure to all three  $\beta$ -lactams. This co-regulation by  $\beta$ -lactams  
274 strongly suggested that *CD0457* is co-transcribed with *CD0458* and that the CD0457 predicted  
275 membrane protein product could play a role in the  $\beta$ -lactam resistance. The expression of the  
276 homologous gene in *C. difficile* strain R20291 was also comparably induced upon exposure to  
277 these  $\beta$ -lactams, indicating a similar organization in divergent strains (**Figure S3**).

278       To determine if the *CD0457* and *blaD* genes are part of a single cistronic unit, we  
279 assessed the linkage of these transcripts by amplifying the region between *CD0457* and *blaD*  
280 from cDNA generated after exposure of *C. difficile* strains 630 $\Delta$ *erm* and R20291 to ampicillin  
281 (**Figure S4A**). **Figure S4B** illustrates the results of the PCR from cDNA that generated a  
282 product of 1 kb, which matches the genomic DNA product from the same strain. These data  
283 demonstrate that the transcription of *CD0457* and *blaD* are linked, indicating that they comprise  
284 a monocistronic unit. Since *CD0457* and *blaD* form an operon and the function of CD0457 is  
285 unknown, we named the *CD0457* gene *blaX*.

286 To further define the transcriptional organization of the *bla* operon, we examined  
287 promoter activity within the *bla* locus. Potential promoter activity was measured for putative  
288 promoter regions within the locus using *phoZ* reporter fusions, which produce alkaline  
289 phosphatase (50). As illustrated in **Figure 3**, regions of 300 nucleotides directly upstream of the  
290 start codons of *blaX* or *blaD* were fused to *phoZ* and expressed in *C. difficile*. The results of  
291 these reporter assays indicate that the region 300 nucleotides upstream of *blaX*, but not the  
292 region 300 nucleotides upstream of *blaD*, is able to promote transcription, resulting in  
293 measurable activity. To confirm the absence of a cryptic *blaD* promoter located within the *blaX*  
294 coding region, the entire region from the translational start of *blaX* to the start codon of *blaD* was  
295 also examined for possible promoter activity. However, no transcriptional activity was observed  
296 from this region (**Figure 3**). The only segment that produced significant and inducible activity  
297 contained the region upstream of the *blaX* coding sequence, strongly suggesting that solely this  
298 region drives *blaX* and *blaD* expression.

299

### 300 **The *bla* operon contributes to ampicillin resistance in *C. difficile***

301 Notably, 36% of complete *C. difficile* genomes contain a homolog of *blaX*. Other  
302 sequenced genomes simply contain the same promoter and *blaD* region without the membrane  
303 protein. The membrane protein only shares approximately 23-40% amino acid identity to  
304 uncharacterized proteins found in a handful of other bacterial species. Thus, the function of this  
305 membrane protein cannot be inferred from other systems. To define the roles of BlaX and BlaD  
306 in  $\beta$ -lactam resistance and in  $\beta$ -lactamase activity, we created mutants of the 630 $\Delta$ *erm* strain  
307 with an insertional mutation in the *blaX* gene (MC905) or complete deletion of the *blaX-blaD*  
308 locus (MC1327). Compared to the parent strain, *blaX::erm* displayed decreased, but still  
309 inducible *blaD* expression (**Figure S5**). Although *blaX* transcription is measurable in the  
310 *blaX::erm* mutant, the product is presumably non-functional because of the insertional mutation.

311 We confirmed that neither the *blaX* nor the *blaD* transcript was expressed in the  $\Delta blaXD$  mutant  
312 (**Figure S5**).

313 Based on the induction of  $\beta$ -lactamase activity and the induction of the *bla* operon by  $\beta$ -  
314 lactams, we hypothesized that deletion of the operon would reduce *C. difficile* resistance to  $\beta$ -  
315 lactams. As shown in **Figure 4**, we performed growth curves with the  $\Delta blaXD$  and *blaX::erm*  
316 strains in cefoperazone, ampicillin, and imipenem to measure the contribution of the *bla* operon  
317 to  $\beta$ -lactam resistance in *C. difficile*. While the deletion of *blaX* and *blaD* did not significantly  
318 affect growth in cefoperazone,  $\Delta blaXD$  and *blaX::erm* growth was impaired in ampicillin  
319 compared to the parent strain. These data suggest that the *bla* operon contributes to ampicillin  
320 resistance in *C. difficile*. Interestingly, the deletion of *blaX* and *blaD* improved growth in  
321 imipenem, supporting the finding by Toth *et al.* that BlaD binds to, but does not hydrolyze  
322 imipenem (39).

323 Antibiotic resistance in clinically relevant bacteria is often characterized by minimum  
324 inhibitory concentrations (MIC) of antibiotics. To further define the contribution of *blaX* and *blaD*  
325 to  $\beta$ -lactam resistance in *C. difficile*, we measured the MIC of  $\beta$ -lactams in 630 $\Delta erm$ ,  $\Delta blaXD$ ,  
326 and *blaX::erm*. Although the parent strain grew better in ampicillin, the MICs for both  
327 cefoperazone and ampicillin were similar in all three strains (**Table S1**), and higher for 630 $\Delta erm$   
328 in imipenem, indicating a modest difference in resistance values.

329

### 330 **The *bla* operon encodes the only functional $\beta$ -lactamase in *C. difficile***

331 Although *blaD* was the only annotated  $\beta$ -lactamase induced by  $\beta$ -lactams (**Figure 1**), it  
332 was plausible that another  $\beta$ -lactamase existed in *C. difficile*. To determine if the *bla* operon  
333 encodes the only  $\beta$ -lactamase in *C. difficile*, we measured the  $\beta$ -lactamase activity of  $\Delta blaXD$  in  
334 a nitrocefin hydrolysis assay. As shown in **Figure 5A**, no apparent  $\beta$ -lactamase activity was  
335 observed for the  $\Delta blaXD$  strain. In comparison, the *blaX::erm* strain exhibits a slight change in  
336 color to a light pink, indicating that this mutant does not fully abolish production and activity of

337 the  $\beta$ -lactamase, which is in agreement with the decrease in *blaD* gene expression observed for  
338 this strain (**Figure S5**). These results strongly suggest that *blaD* encodes the only functional  $\beta$ -  
339 lactamase in *C. difficile*.

340

### 341 **The *bla* operon exhibits high level, dose-dependent expression in $\beta$ -lactams**

342 The induction of both *blaX* and *blaD* by  $\beta$ -lactams suggested that these genes are  
343 important for  $\beta$ -lactam resistance in *C. difficile*. To determine whether these genes could be  
344 induced by other cell wall targeting antimicrobials or if the induction is specific to  $\beta$ -lactam  
345 exposure, we measured the levels of gene expression for *C. difficile* strain 630 $\Delta$ *erm* in various  
346 cell wall targeting antibiotics (vancomycin, polymyxin B, and lysozyme) and cationic  
347 antimicrobial peptides (nisin and LL-37), as well as a ribosome-targeting antibiotic (kanamycin).  
348 **Figure S6** shows that expression of *blaX* and *blaD* were induced in the presence of kanamycin  
349 and polymyxin B. However, these levels of expression are not statistically significant and were  
350 less than 3% of the levels seen for expression after  $\beta$ -lactam exposure, suggesting that the high  
351 levels of induction of *blaX* and *blaD* are specific to  $\beta$ -lactams.

352 Although the levels of *blaX* and *blaD* induction were high in all three  $\beta$ -lactams,  
353 expression varied greatly between each  $\beta$ -lactam. These results suggested that the level of  
354 induction of the *bla* operon is dependent upon the type of  $\beta$ -lactam *C. difficile* is exposed to and  
355 could be dose-dependent. To determine if the *bla* operon exhibits dose-dependent expression in  
356  $\beta$ -lactams, we measured the relative expression of *blaX* and *blaD* in the 630 $\Delta$ *erm* strain in  
357 varying concentrations of cefoperazone, ampicillin, and imipenem. **Figure S7** shows that the *bla*  
358 operon did indeed exhibit dose-dependent induction by  $\beta$ -lactams and that the response was  
359 different for the various classes of  $\beta$ -lactams. In increased concentrations of cefoperazone,  
360 induction of the *bla* operon trended downward, whereas expression trended upward in  
361 increased concentrations of ampicillin. Expression of the *bla* operon was high in all  
362 concentrations of imipenem, exhibiting only a modest increase in expression as the

363 concentration of imipenem was increased. Furthermore, the level of induction of the *bla* operon  
364 was high even at concentrations of  $\beta$ -lactams far below the MIC (0.03125x MIC of  
365 cefoperazone, 0.125x of ampicillin, and 0.0625x MIC of imipenem). These results suggest that  
366 *bla* expression is controlled in a dose-dependent manner specific to the class of  $\beta$ -lactam  
367 administered.

368

### 369 **BlaX is not necessary for BlaD activity**

370 Of the 72 genomes retrieved from a *blaD* BLASTn search of *C. difficile*, 42 strains  
371 encode the upstream putative membrane protein, suggesting that the membrane protein BlaX  
372 may be important for  $\beta$ -lactamase activity in some strains, but not in others. To determine the  
373 importance of the membrane protein, we first assessed  $\beta$ -lactamase activity in *C. difficile* strain  
374 M120, which lacks a homolog of *blaX*. The BlaD enzyme from strains M120 and 630 $\Delta$ *erm* are  
375 highly similar, but the 4% variability clearly lies within the N-termini of these proteins (**Figure**  
376 **S8A**). As shown in **Figure S8B**, strain M120 does exhibit  $\beta$ -lactamase activity. The variability in  
377 the amino acid sequence of these two enzymes may be due to differences in signal sequence  
378 recognition, but a potential interaction with another protein cannot be ruled out.

379 As the function of BlaX was not immediately apparent, we examined whether BlaX is  
380 necessary to observe the  $\beta$ -lactamase activity of BlaD in strain 630 $\Delta$ *erm*. To test this, we  
381 complemented the  $\Delta$ *blaXD* strain with *blaX* and/or *blaD* in trans. The nitrocefin disk assays in  
382 **Figure 5B** demonstrate that expression of *blaD* alone can restore  $\beta$ -lactamase activity in the  
383  $\Delta$ *blaXD* mutant, indicating that BlaD can act independently of BlaX, despite the co-transcription  
384 of these two genes. This result is further supported by the observation that the *blaX::erm* strain  
385 exhibits some  $\beta$ -lactamase activity (**Figure 5A**).

386

387 **BlaD contains a predicted signal sequence and is associated with the cell membrane**

388 A common characteristic of  $\beta$ -lactamases is an N-terminal signal sequence that directs the  
389 protein out of the cytoplasm. We hypothesized that the N-terminus of BlaD encodes a signal  
390 sequence based on the signal sequence prediction within the first 18 amino acid residues (58,  
391 59). We generated a truncated version of BlaD missing these first 18 residues (BlaD $\Delta$ 18;  
392 *pblaD* $\Delta$ 18). As shown in **Figure 5B**, the expression of BlaD $\Delta$ 18 is unable to complement the  
393 absence of  $\beta$ -lactamase activity in the  $\Delta$ *blaXD* mutant in a whole cell assay. qRT-PCR results  
394 shown in **Figure S9** confirm that *blaX* and/or *blaD* are expressed in the complemented strains,  
395 indicating that the absence of gene expression is not the cause of the lack of observable  $\beta$ -  
396 lactamase activity. This suggested that BlaD $\Delta$ 18 is either not translated, is an unstable or  
397 inactive protein, or is active but trapped in the cytosol and unable to hydrolyze nitrocefin.

398 All of the characterized  $\beta$ -lactamases in Gram-positive bacteria are membrane-bound  
399 enzymes, although many of these proteins are cleaved, resulting in a smaller, soluble form that  
400 can be found in culture supernatants (29, 31, 34, 36). These findings are consistent with the  
401 lack of a periplasmic space for  $\beta$ -lactamases accumulation in Gram-positive bacteria. To  
402 determine if a soluble form of BlaD is secreted into the culture medium, we performed a  
403 nitrocefin hydrolysis assay using culture supernatants. As shown in **Figure 6A and 6C**, neither  
404 the supernatants of  $\Delta$ *blaXD* cells harboring *pblaD* or *pblaX-blaD*, nor the wild-type strains  
405 630 $\Delta$ *erm* or M120, react with nitrocefin, indicating that BlaD is not secreted into the medium. To  
406 confirm that BlaD is a membrane-associated enzyme, we lysed the cells and performed a  
407 nitrocefin hydrolysis assay using lysates containing cell debris (denoted as 'lysates') or the  
408 cleared cell lysates (denoted as 'lysate filtrate'). **Figures 6B and 6D** show that when comparing  
409 the level of activity in the lysate to the lysate filtrate in strains containing a full-length *blaD*, 74-  
410 80% of the total  $\beta$ -lactamase activity is found in the cell debris, indicating that BlaD is associated  
411 with the cell surface. Furthermore, BlaD $\Delta$ 18 activity is not associated with the cell surface, as  
412 demonstrated by the similar levels of activity in the lysate and the lysate filtrate (**Figure 6B**).  
413 This result indicates that BlaD $\Delta$ 18 is an active, soluble form of BlaD that is trapped in the



414 cytosol, and strongly suggests that the first 18 residues at the N-terminus of BlaD encode a  
415 signal sequence. Together, these results support the presence of a signal sequence that helps  
416 bring the protein to the cell surface.

417

#### 418 **BlaX aids in BlaD activity**

419 Although BlaX is not necessary for BlaD activity (**Figure 5A, B**), *blaX* is conserved in many *C.*  
420 *difficile* strains. Thus, we examined whether BlaX enhances BlaD activity. The results shown in  
421 **Figure 6A and 6B** demonstrate that the presence of BlaX increases  $\beta$ -lactamase activity of the  
422 630 $\Delta$ *erm* BlaD two to three-fold, suggesting that BlaX plays a role in the function of BlaD. To  
423 investigate the activity of a BlaD from a *C. difficile* genome that lacks BlaX, we also  
424 complemented the  $\Delta$ *blaXD* strain with *blaD* cloned from the M120 genome, under the M120  
425 native promoter. **Figure 6A** shows that in cell suspensions of  $\Delta$ *blaXD* complemented strains,  
426 the M120 BlaD (pM120*blaD*) exhibits two-fold higher activity than the 630 $\Delta$ *erm* BlaD (p*blaD*).  
427 This result suggests that the M120 BlaD is superior to the 630 $\Delta$ *erm* BlaD at translocating to the  
428 cell surface when BlaX is not present. However, M120 BlaD is only two-thirds as active as the  
429 630 $\Delta$ *erm* BlaXD complement (p*blaXD*). In lysed cells, the M120 BlaD  $\beta$ -lactamase activity levels  
430 are slightly higher than the 630 $\Delta$ *erm* BlaD (**Figure 6B**). Interestingly, the wild-type strains  
431 630 $\Delta$ *erm* and M120 exhibit similar  $\beta$ -lactamase activity levels in both cell suspension and lysate  
432 samples, indicating that their overall efficacy is comparable (**Figure 6C and D**). Together, these  
433 results demonstrate that in 630 $\Delta$ *erm*, BlaX enhances BlaD activity, while in M120,  $\beta$ -lactamase  
434 activity is not dependent on BlaX. Finally, because the M120 BlaD does not fully complement  
435 the  $\Delta$ *blaXD* strain, the N-terminal sequence variability of the BlaD proteins likely plays a role in  
436 strain-dependent translocation of BlaD to the cell surface.

437

#### 438 **The *bla* operon is regulated by BlaIR**

439 Transcription of most  $\beta$ -lactamase genes in Gram-positive bacteria is regulated by the two-  
440 component BlaRI system (60-62). The *C. difficile* genome encodes several orthologs of the two  
441 genes that make up this system, *blaI* and *blaR*. In other bacteria, BlaR is a sensor that is  
442 activated upon  $\beta$ -lactam binding (63). Activated BlaR cleaves the Blal repressor, which is bound  
443 as a dimer to the *bla* operon promoter in the absence of  $\beta$ -lactams (64-66). Once cleaved, Blal  
444 can no longer bind to the *bla* promoter, thus allowing for active transcription. Two candidate  
445 orthologs *CD0471* (*blaI*) and *CD0470* (*blaR*) are located 11 kb downstream of the *blaXD*  
446 operon. To determine if these *blaIR* orthologs regulate the *blaXD* operon in *C. difficile*, we  
447 created an insertional disruption in *blaI*. **Figure S10** shows that transcription of *blaI* and *blaR*  
448 are decreased in the *blaI::erm* mutant, confirming that *blaI* and *blaR* are organized in an operon,  
449 as is consistent with other bacteria. As shown in **Figure 7**, in the absence of  $\beta$ -lactams, *blaX*  
450 and *blaD* are transcribed at high levels in the *blaI::erm* mutant, as compared to the wild-type  
451 630 $\Delta$ *erm* strain. These results confirm that Blal acts as a repressor of the *bla* operon. Further,  
452 the induction of *blaXD* in  $\beta$ -lactams in the wild-type strain, but not in the mutant, strongly  
453 suggests that Blal repression is relieved by the presence of  $\beta$ -lactams in wild-type strain. To  
454 verify that relief of Blal repression results in  $\beta$ -lactamase production, we performed a nitrocefin  
455 hydrolysis assay on the *blaI::erm* mutant. **Figure 5C** confirms that the absence of Blal results in  
456 active  $\beta$ -lactamase, independent of  $\beta$ -lactam presence. Together, these results show that *C.*  
457 *difficile* encodes a BlaRI system that represses *bla* transcription in the absence of  $\beta$ -lactams.  
458 Efforts to complement *blaIR* resulted in poor growth of *E. coli* mating strains, as well as *C.*  
459 *difficile*, and were not successful.

460 To further confirm that the BlaRI system regulates the *bla* operon and to define its  
461 contribution to ampicillin resistance, we examined the growth of the *blaI::erm* mutant in multiple  
462  $\beta$ -lactams. **Figure 8A** illustrates that growth of the *blaI* mutant is not significantly different than  
463 the wild-type 630 $\Delta$ *erm* strain in the presence of cefoperazone. However, growth of the *blaI*  
464 mutant is significantly improved in the presence of ampicillin, as compared to 630 $\Delta$ *erm* (**Figure**

465 **8B**). Similarly, the *blaI::erm* mutant shows slightly impaired growth in imipenem, as compared to  
466 630 $\Delta$ *erm* (**Figure 8C**). These results show that BlaIR contributes to ampicillin and imipenem  
467 resistance in *C. difficile* through regulation of the *bla* operon.

468

## 469 **DISCUSSION**

470 This study provides evidence for  $\beta$ -lactam-dependent expression of the  $\beta$ -lactamase,  
471 BlaD, in two strains of *C. difficile*, 630 $\Delta$ *erm* and R20291, as well as activity of BlaD in both  
472 630 $\Delta$ *erm* and M120. The *blaD* gene is located in an operon with *blaX*, which encodes a putative  
473 membrane protein (**Figure S4**). Our data indicate that the promoter for the *blaXD* operon is  
474 located within a 300 nucleotide region located directly upstream of the *blaX* start codon (**Figure**  
475 **3**). The high level of *blaD* and *blaX* expression in response to  $\beta$ -lactams far below MICs (**Figure**  
476 **S7**), indicate that the promoter of the *bla* operon is quite strong, in contrast to a previous report  
477 in which part of the *blaD* locus was expressed in a heterologous host (39).

478 Our work has demonstrated that BlaD is a  $\beta$ -lactamase that is only active under  
479 anaerobic (reducing) conditions (**Figure 1**). To our knowledge, no other anaerobic  $\beta$ -lactamases  
480 have been reported, which is not surprising given that  $\beta$ -lactamase assays are generally  
481 performed in the presence of oxygen (67, 68). This, however, may be one reason that so few  $\beta$ -  
482 lactamases have been identified in anaerobic, Gram-positive bacteria (69-72). Indeed, the  
483 addition of 0.2 mM DTT to the nitrocefin hydrolysis assays, or steady-state enzyme kinetics  
484 (39), allowed for observation of BlaD activity (**Figure 6**) by maintaining reducing conditions.  
485 Assaying  $\beta$ -lactamases from other anaerobic, Gram-positive bacteria under reducing conditions  
486 may lead to the identification of more anaerobic  $\beta$ -lactamases in other species.

487 Our data indicate that BlaD acts at the cell membrane, in accordance with other  $\beta$ -  
488 lactamases from Gram-positive bacteria (**Figure 6**). We have shown that BlaD likely contains a  
489 signal sequence at the N-terminus, which facilitates translocation of BlaD to the membrane.  
490 BlaD is not secreted into the environment, but remains associated with the cell surface (**Figure**

491 6). While the exact function of BlaX is unknown, the data demonstrate that BlaD activity is  
492 enhanced by the presence of BlaX (**Figure 6B**). BlaX has five predicted transmembrane  
493 domains, with an approximate 125 residue-long extracellular loop (73). Because the activity of  
494 BlaD is membrane-associated across all samples except BlaD $\Delta$ 18, and BlaD activity in cell  
495 lysates lacking BlaX is 60% less than when BlaX is present, it is possible that BlaX interacts  
496 with BlaD in a way that makes BlaD more accessible to substrates on the cell surface. Nitrocefin  
497 hydrolysis assays showed that in cell lysates, the activity of full length BlaD (*pblaD*) is 45% less  
498 than BlaD $\Delta$ 18 (**Figure 6B**). This suggests that either BlaD is cleaved at the N-terminus after  
499 translocation to the cell membrane, or BlaX helps to relieve a steric hindrance caused by  
500 insertion into the cell membrane. The absence of  $\beta$ -lactamase activity in cell supernatants does  
501 not support cleavage of BlaD, unless BlaD remains anchored to the cell membrane after  
502 cleavage, which is unlikely due to the absence of a canonical lipobox immediately downstream  
503 of the signal peptide (74).

504 To date, only one other published  $\beta$ -lactamase is reported to be co-transcribed with a  
505 membrane protein (75). This membrane-bound  $\beta$ -lactamase, PenA, found in the Gram-negative  
506 *Burkholderia pseudomallei*, is encoded in an operon with *nlpD1*, a gene annotated as an outer  
507 membrane lipoprotein and thought to be involved in cell wall hydrolytic amidase activation (76).  
508 However, *C. difficile* does not contain an outer membrane, and *nlpD1* is not homologous with  
509 *blaX*. Analysis of the *blaD* locus in the *C. difficile* strain M120, which does not contain a full *blaX*  
510 coding sequence, revealed regions of partial homology to the 5' and 3' ends of *blaX*, located  
511 between the promoter and the *blaD* start codon. This suggests that over the course of evolution  
512 of *C. difficile*, the majority of this gene was deleted. A search of the rest of the M120 genome  
513 revealed no other proteins similar to BlaX, further supporting the model that in many *C. difficile*  
514 strains, BlaX is not necessary for sufficient BlaD activity. However, the superior activity levels of  
515 M120 BlaD (**Figures 6A and 6B**), the 74% of cell surface-associated activity of M120 BlaD

516 **(Figure 6B)**, as well as the equal levels of  $\beta$ -lactamase activity of the 630 $\Delta$ *erm* strain compared  
517 to M120 **(Figure 6D)**, suggest that M120 likely has a different mechanism of translocation.

518 We have shown that the *bla* operon confers resistance to ampicillin and is regulated by  
519 the BlaRI system in *C. difficile* **(Figures 5, 8)**. Disruption of *blaI* resulted in constitutive  
520 expression of *blaX* and *blaD* **(Figure 7)**, which resulted in improved growth in ampicillin **(Figure**  
521 **8)**, supporting the model that BlaI is a direct repressor of the *bla* operon. We identified a 52-  
522 nucleotide region of dyad symmetry in the promoter of the *bla* operon, which contains a  
523 canonical BlaI binding site, supporting the model of BlaI-P*blaX* binding, but does not rule out  
524 other binding partners. Our results align with previously reported data that BlaD confers  
525 resistance to penicillins (39). The discrepancy of the MIC values versus the growth curves can  
526 be attributed to the exact nature of a growth curve. Further investigation is needed to fully define  
527 the mechanisms of  $\beta$ -lactam resistance in *C. difficile*. Identification and characterization of the  
528 additional  $\beta$ -lactam resistance mechanisms may aid in preventing *C. difficile* infections and  
529 recurrence in the future.

530

### 531 **ACKNOWLEDGEMENTS**

532 We thank members of the McBride lab and the dissertation committee of B.K.S. for helpful  
533 suggestions and discussions throughout the course of this work. This research was supported  
534 by the U.S. National Institutes of Health (NIH) through research grants AI116933 and AI121684  
535 to S.M.M., and training grant AI106699 to S.A. The content of this manuscript is solely the  
536 responsibility of the authors and does not necessarily reflect the official views of the National  
537 Institutes of Health.

538

### 539 **FIGURE LEGENDS**

540 **Figure 1. *C. difficile* strains exhibit inducible, anaerobic  $\beta$ -lactamase activity.** Hydrolysis of  
541 the chromogenic cephalosporin nitrocefim was assessed for strains 630 $\Delta$ *erm* **(A, B, D, E)** and

542 R20291 (**C, F**). Strains were grown for ~24 h on BHIS agar (**A-C**) or BHIS agar + 75 µg/ml  
543 cefoxitin (Fox; **D-F**). Cells were resuspended in water and incubated aerobically (**A, D**) or  
544 anaerobically (**B, C, E, F**) on nitrocefin disks. Color change from yellow to red indicates  
545 cleavage of nitrocefin.

546

547 **Figure 2. The putative β-lactamase, CD0458, and the upstream gene, CD0457 are induced**  
548 **by β-lactams. A)** The putative β-lactamase gene *CD0458* is 27 bp downstream of the predicted  
549 membrane protein, *CD0457*. **B)** Relative expression of each gene was measured via qRT-PCR.  
550 *C. difficile* strain 630Δ*erm* was grown to mid-log in BHIS medium supplemented with sub-  
551 inhibitory concentrations of β-lactams (Cfp: cefoperazone 50 µg/mL; Amp: ampicillin 2 µg/mL;  
552 lpm: imipenem 1.5 µg/mL). mRNA levels are normalized to expression levels in BHIS alone.  
553 Columns represent the means +/- SEM from three independent replicates. Data were analyzed  
554 by one-way ANOVA with Dunnett's multiple comparisons test, compared to no antibiotic.  
555 Adjusted *P* values indicated by \*≤0.05.

556

557 **Figure 3. Alkaline phosphatase activity from P<sub>blaXD</sub>::*phoZ* is induced in the presence of**  
558 **ampicillin.** *C. difficile* 630Δ*erm* cultures were grown to an OD<sub>600</sub> of ~0.5 in BHIS with 2 µg/mL  
559 thiamphenicol for plasmid maintenance in the presence or absence of 2 µg/mL ampicillin .  
560 Strains: MC448 (:::*phoZ* - empty vector); MC1317 (P<sub>blaXD</sub>::*phoZ*); MC1318 (5' *blaD*::*phoZ*);  
561 MC1369 (*blaX*::*phoZ*). The means and standard errors of the means of three biological  
562 replicates are shown. Data were analyzed by one-way ANOVA with Dunnett's multiple  
563 comparison test. Adjusted *P* value indicated by \*\*\*\*<0.0001.

564

565 **Figure 4. *blaX* and *blaD* contribute to β-lactam resistance in *C. difficile*.** *C. difficile* strains  
566 630Δ*erm* (green), *blaX*::*erm* (MC905; pink), and Δ*blaXD* (MC1327; blue) were grown to mid-log,  
567 backdiluted to OD 0.05, and grown in BHIS supplemented with **A)** Cfp: cefoperazone 60 µg/mL,

568 **B)** Amp: ampicillin 4 µg/mL, or **C)** Ipm: imipenem 2 µg/mL. Lines represent the means +/- SEM  
569 from four independent replicates. Data were analyzed by one-tailed paired Student's *t*-test,  
570 compared to 630Δ*erm*. No statistically significant differences found.

571

572 **Figure 5. The N-terminus of BlaD is necessary for β-lactamase secretion, independent of**  
573 **BlaX.** Hydrolysis of the chromogenic cephalosporin nitrocefin was assessed for **A)** strains  
574 630Δ*erm*, *blaX::erm* (MC905), and Δ*blaXD* (MC1327) and **B)** strain Δ*blaXD* complemented with  
575 *blaX* and/or *blaD*, expressed from their native promoter. Strains were grown anaerobically to  
576 mid-log in BHIS medium (with 2 µg/mL thiamphenicol for plasmid maintenance in **B)** +/- 2 µg/mL  
577 ampicillin and pelleted. Cell pellets in ~30 µL of remaining media were incubated anaerobically  
578 on nitrocefin disks for 2 h. Color change from yellow to red indicates cleavage of nitrocefin.

579

580 **Figure 6. BlaD utilizes a signal sequence to act at the cell membrane.** Δ*blaXD* (**A, B**) or  
581 630Δ*erm*, Δ*blaXD*, and M120 (**C, D**) *C. difficile* were grown to mid-log phase in 2 µg/mL  
582 thiamphenicol and 2 µg/mL ampicillin and assayed for β-lactamase activity via a nitrocefin assay  
583 in **A, C)** supernatant or cell suspension and **B, D)** cell lysate or cell lysate filtrate. Δ*blaXD*  
584 pMC123 (MC 1400); Δ*blaXD* p*blaXD* (MC1399); Δ*blaXD* p*blaD* (MC1466); Δ*blaXD* p*blaD*Δ18  
585 (MC1338); Δ*blaXD* pM120*blaD* (MC1494). Columns represent the means +/- SEM from at least  
586 three independent replicates. Data were analyzed by one-way ANOVA with Dunnett's multiple  
587 comparisons test, compared to p*blaD* in A) and B) or 630Δ*erm* in C) and D), or by a two-tailed  
588 unpaired student's *t*-test, where indicated by bars. Absence of asterisk indicates no statistically  
589 significant difference found. Adjusted *P* values indicated by \*≤0.05, \*\*\*\*<0.0001.

590

591 **Figure 7. blaXD is derepressed in the blaI::erm strain.** qRT-PCR was performed to measure  
592 expression of **A)** *blaX* and **B)** *blaD* in *C. difficile* 630Δ*erm* and *blaI::erm* strains grown to mid-log  
593 in BHIS media with or without β-lactam (Cfp: cefoperazone 60 µg/mL; Amp: ampicillin 2 µg/mL;

594 lpm: imipenem 1.5 µg/mL). mRNA levels are normalized to expression levels in 630Δ*erm* in  
595 BHIS alone. Columns represent the means +/- SEM from three independent replicates. Data  
596 were analyzed by one-way ANOVA with Dunnett's multiple comparisons test, compared to  
597 expression in 630Δ*erm* without antibiotic. Adjusted *P* values indicated by \*≤0.05, \*\*≤0.005.

598

599 **Figure 8. *blal* grants resistance to ampicillin.** *C. difficile* strains 630Δ*erm* (gray) and *blal::erm*  
600 (MC985; red) were grown to mid-log, backdiluted to OD 0.05, and grown in BHIS (no marker) or  
601 BHIS supplemented (filled marker) with **A**) 60 µg/mL cefoperazone (Cfp), **B**) 4 µg/mL ampicillin  
602 (Amp), or **C**) 2 µg/mL imipenem (lpm). Lines represent the means +/- SEM from three  
603 independent replicates. Data were analyzed by one-tailed paired Student's *t*-test, compared to  
604 630Δ*erm*. Adjusted *P* values indicated by \*≤0.05.

605

606

607

608

609

610

611

612

613

614

615

616

617

618

619



620 **Table 1. Bacterial Strains and plasmids**

| Plasmid or Strain   | Relevant genotype or features                                                                                                                       | Source, construction or reference |
|---------------------|-----------------------------------------------------------------------------------------------------------------------------------------------------|-----------------------------------|
| <b>Strains</b>      |                                                                                                                                                     |                                   |
| <i>E. coli</i>      |                                                                                                                                                     |                                   |
| HB101               | F <sup>-</sup> <i>mcrB mrr hsdS20(r<sub>B</sub><sup>-</sup> m<sub>B</sub><sup>-</sup>) recA13 leuB6 ara-14 proA2 lacY1 galk2 xyl-5 mtl-1 rpsL20</i> | B. Dupuy                          |
| DH5α                |                                                                                                                                                     |                                   |
| <i>C. difficile</i> |                                                                                                                                                     |                                   |
| 630                 | Clinical isolate                                                                                                                                    | (77)                              |
| 630Δ <i>erm</i>     | Erm <sup>S</sup> derivative of strain 630                                                                                                           | (78)                              |
| M120                | Clinical isolate                                                                                                                                    | (79)                              |
| MC324               | 630Δ <i>erm</i> pMC123                                                                                                                              | (52)                              |
| MC448               | 630Δ <i>erm</i> pMC358                                                                                                                              | (50)                              |
| MC905               | <i>blaX::erm</i>                                                                                                                                    | This study                        |
| MC985               | <i>blaI::erm</i>                                                                                                                                    | This study                        |
| MC1316              | 630Δ <i>erm</i> pMC822                                                                                                                              | This study                        |
| MC1317              | 630Δ <i>erm</i> pMC826                                                                                                                              | This study                        |
| MC1318              | 630Δ <i>erm</i> pMC827                                                                                                                              | This study                        |
| MC1327              | 630Δ <i>erm</i> Δ <i>blaXD</i>                                                                                                                      | This study                        |
| MC1369              | 630Δ <i>erm</i> pMC842                                                                                                                              | This study                        |
| MC1338              | Δ <i>blaXD</i> pMC811                                                                                                                               | This study                        |
| MC1399              | Δ <i>blaXD</i> pMC867                                                                                                                               | This study                        |
| MC1400              | Δ <i>blaXD</i> pMC123                                                                                                                               | This study                        |
| MC1438              | <i>blaI::erm</i> pMC123                                                                                                                             | This study                        |
| MC1466              | Δ <i>blaXD</i> pMC897                                                                                                                               | This study                        |
| MC1494              | Δ <i>blaXD</i> pMC896                                                                                                                               | This study                        |
| MC1509              | <i>blaI::erm</i> pMC920                                                                                                                             | This study                        |
| <b>Plasmids</b>     |                                                                                                                                                     |                                   |
| pRK24               | Tra <sup>+</sup> , Mob <sup>+</sup> ; <i>bla</i> , <i>tet</i>                                                                                       | (80)                              |
| pCR2.1              | <i>bla</i> , <i>kan</i>                                                                                                                             | Invitrogen                        |
| pCE240              | <i>C. difficile</i> TargeTron construct based on pJIR750ai (group II intron, <i>ermB::RAM</i> , <i>ItrA</i> ), <i>catP</i>                          | (43)                              |
| pMTL-SC7215         | Pseudo-suicide plasmid used for allelic exchange in <i>C. difficile</i>                                                                             | (44)                              |
| pMC123              | <i>E. coli</i> - <i>C. difficile</i> shuttle vector; <i>bla</i> , <i>catP</i>                                                                       | (53)                              |
| pMC358              | pMC123:: <i>phoZ</i>                                                                                                                                | (50)                              |
| pMC585              | pCR2.1 + group II intron targeted to <i>blaX</i>                                                                                                    | This study                        |
| pMC586              | pCE240 + group II intron targeted to <i>blaX</i>                                                                                                    | This study                        |
| pMC593              | pCR2.1 + group II intron targeted to <i>blaI</i>                                                                                                    | This study                        |
| pMC622              | pCE240 + group II intron targeted to <i>blaI</i><br>pMC123 + group II intron targeted to <i>blaX</i> , <i>ermB::RAM</i> , <i>ItrA</i> , <i>catP</i> | This study<br>This study          |
| pMC664              | pMC123 + group II intron targeted to <i>blaI</i> , <i>ermB::RAM</i> , <i>ItrA</i> , <i>catP</i>                                                     | This study                        |
| pMC810              | pMC123 + P <sub><i>blaXD</i></sub> + <i>blaX</i>                                                                                                    | This study                        |
| pMC811              | pMC123 + P <sub><i>blaXD</i></sub> + <i>blaDD</i> Δ18                                                                                               | This study                        |

|        |                                                                    |            |
|--------|--------------------------------------------------------------------|------------|
| pMC822 | pMTL-SC7215 + 500bp 5' + 500bp 3' of <i>blaXD</i>                  | This study |
| pMC826 | pMC358 + P <sub><i>blaXD</i></sub> (300 bp 5' UTR of <i>blaX</i> ) | This study |
| pMC827 | pMC358 + 300 bp 5' UTR of <i>blaD</i>                              | This study |
| pMC842 | pMC358 + <i>blaX</i>                                               | This study |
| pMC867 | pMC123 + P <sub><i>blaXD</i></sub> + <i>blaXD</i>                  | This study |
| pMC896 | pMC123 + P <sub>M120<i>blaD</i></sub> + M120 <i>blaD</i>           | This study |
| pMC897 | pMC123 + P <sub><i>blaXD</i></sub> + <i>blaD</i>                   | This study |
| pMC920 | pMC123 + P <sub><i>blaI</i></sub> + <i>blaI</i>                    | This study |

621

622

623 **Table 2. Oligonucleotides**

624 Underlined nucleotides denote the restriction sites used for vector construction.

| Primer  | Sequence (5'→3')                                                    | Use/locus tag/reference                     |
|---------|---------------------------------------------------------------------|---------------------------------------------|
| oMC44   | CTAGCTGCTCCTATGTCTCACATC                                            | qPCR/ <i>rpoC</i> (81)                      |
| oMC45   | CCAGTCTCTCCTGGATCAACTA                                              | qPCR/ <i>rpoC</i> (81)                      |
| oMC1184 | AACAAGAAGGTCACCATGTTCTAC                                            | qPCR/ <i>blaD</i>                           |
| oMC1185 | TACTCTGTACCATCATATCCCATAACT                                         | qPCR/ <i>blaD</i>                           |
| oMC1212 | GCTTTGTCTTGATTGATACTGGATATG                                         | qPCR/ <i>CD0527</i>                         |
| oMC1213 | CATGAGCATGAGTTAGAAATATGTATCG                                        | qPCR/ <i>CD0527</i>                         |
| oMC1214 | GCTCTCACAACCTGGAACCTTTAATA                                          | qPCR/ <i>CD3196</i>                         |
| oMC1215 | TTGCAATACCTATTAAGGCTGATATAATAC                                      | qPCR/ <i>CD3196</i>                         |
| oMC1216 | GTATTGAGTATGTTATTTACTGCTGCTC                                        | qPCR/ <i>CD1469</i>                         |
| oMC1217 | TATTGAGCACTTACAGCACCAT                                              | qPCR/ <i>CD1469</i>                         |
| oMC1218 | CAATAGTAGGTGTATACGTAGATGGTAAAG                                      | qPCR/ <i>CD1802</i>                         |
| oMC1219 | GGTCTGCATTTGAATGAGTGTTTATT                                          | qPCR/ <i>CD1802</i>                         |
| oMC1220 | TATAGACCCAGGTGGAAGTTTAGTA                                           | qPCR/ <i>CD2742</i>                         |
| oMC1221 | TGCAACTACTTTAGCACCAGTT                                              | qPCR/ <i>CD2742</i>                         |
| oMC1235 | AGATAGTACTCGTGTTCAAATTGTT                                           | qPCR/ <i>CD0464</i>                         |
| oMC1222 | GTTACCACATATTTT CAGAAGCAGAATATC                                     | qPCR/ <i>blaI</i>                           |
| oMC1223 | TTTAGGACTCCATGTACTTGTCTTCTAC                                        | qPCR/ <i>blaI</i>                           |
| oMC1225 | TTCACGGTCTATACGCATTTCTTTA                                           | sequencing of <i>blaI</i> Targetron         |
| oMC1236 | GCTTAATATCTGTAAGTTTAAATGCCAAGT                                      | qPCR/ <i>CD0464</i>                         |
| oMC1237 | TTGAAGATAACACAGCACTTATGATAGA                                        | qPCR/ <i>CD0344</i>                         |
| oMC1238 | ATTGATTACAAGCTCCATAGTGGTC                                           | qPCR/ <i>CD0344</i>                         |
| oMC1262 | GCTGATAGACACACCTGAAGATATTAC                                         | qPCR/ <i>CD0692</i>                         |
| oMC1263 | CTCCTGTGATAAAGTCACATCCTATTT                                         | qPCR/ <i>CD0692</i>                         |
| oMC1264 | TGATGTTGGACAAGGTGATAGTATT                                           | qPCR/ <i>CD2478</i>                         |
| oMC1265 | GTCTGAATCTGGATGAGTTGCTATTAT                                         | qPCR/ <i>CD2478</i>                         |
| oMC1266 | TGGTTGTA CTACATCAGATAATGGAAATA                                      | qPCR/ <i>CD1930</i>                         |
| oMC1267 | TAATCTACCATTAATCCCTCATCATCATT                                       | qPCR/ <i>CD1930</i>                         |
| oMC1268 | TCATCAAATGTATTCCGGTGAAGATAAAG                                       | qPCR/ <i>CD0655</i>                         |
| oMC1269 | TTAACCTATCAAAGCTCGTGTTACT                                           | qPCR/ <i>CD0655</i>                         |
| oMC1270 | TGGTATCCAGAGGAGCACAA                                                | qPCR/ <i>CD0895</i>                         |
| oMC1271 | TCAATCATTATGAATTTATCACCTATCTCG                                      | qPCR/ <i>CD0895</i>                         |
| oMC1272 | ATTGATAGATACTTTGTTGGAGAACCA                                         | qPCR/ <i>CD0829</i>                         |
| oMC1273 | ATATGAATACATCTGAATATCCCGAATCA                                       | qPCR/ <i>CD0829</i>                         |
| oMC1343 | GGAGGAGTAATGCTACTATTTATAGGTT                                        | qPCR/ <i>blaX</i>                           |
| oMC1344 | GTAAAGCTTAATCATATGTACACAAATCCA                                      | qPCR/ <i>blaX</i>                           |
| oMC1349 | AAAAGCTTTTGCAACCCACGTCGATCGTGAA-<br>CGAATCCTCTGC-GTGCGCCAGATAGGGT   | IBS Targetron/ <i>blaI</i>                  |
| oMC1350 | CAGATTGTACAAATGTGGTGATAACAGATAAGTC-CTCTGCTA-<br>TAACTTACCTTTCTTTG   | EBS1 Targetron/ <i>blaI</i>                 |
| oMC1351 | CGCAAGTTTCTAATTTCCGGTT-ATTCTG-<br>TCGATAGAGGAAAAGTGCT               | EBS2 Targetron/ <i>blaI</i>                 |
| oMC1360 | AAAAGCTTTTGCAACCCACGTCGATCGTGAA-<br>ACATATGATTAA-GTGCGCCAGATAGGGT   | IBS Targetron/ <i>blaX</i>                  |
| oMC1361 | CAGATTGTACAAATGTGGTGATAACAGATAAGTC-GATTAAGC-<br>TAACTTACCTTTCTTTGT  | EBS1 Targetron/ <i>blaX</i>                 |
| oMC1362 | CGCAAGTTTCTAATTTCCGGTT-TATGT-<br>TCGATAGAGGAAAAGTGCT                | EBS2 Targetron/ <i>blaX</i>                 |
| oMC1461 | GTAATATACTCCAGTCTAGGAGC                                             | sequencing of <i>blaX</i> Targetron         |
| oMC1945 | GTAATAAGGAGTTTTGCTCTATATAGACTCCTCCTTTTCAGTTT<br>GTGAGGTAATTATTTATTC | <i>blaXD</i> allelic replacement<br>cloning |

|         |                                                                           |                                                                             |
|---------|---------------------------------------------------------------------------|-----------------------------------------------------------------------------|
| oMC1946 | GAATAAATAATTACCTCACAACTGAAAGGAGGAGTCTATATA<br>GAGCAAACTCCTTTAGTAC         | <i>bla</i> <sub>XD</sub> allelic replacement<br>cloning                     |
| oMC1970 | TACGCCAAGCTTGCATGCCTGCAGGTCGACTCTAGAGACATG<br>AATGTTAAATCCTTTCTGAGTAC     | <i>bla</i> <sub>X</sub> Gibson assembly                                     |
| oMC1971 | ACGGCCAGTGAATTCGAGCTCGGTACCCGGGGATCCCATCTC<br>CTCTACATAAGTTTATAGTTCACC    | <i>bla</i> <sub>X</sub> Gibson assembly                                     |
| oMC1974 | ACGGCCAGTGAATTCGAGCTCGGTACCCGGGGATCCGTA<br>AAGGAGTTTTGCTCTATATAGACTC      | <i>bla</i> <sub>D</sub> Gibson assembly                                     |
| oMC1999 | GTAGAAATACGGTGTGTTTTGTTACCCTAAGTTTAAACGGAGTT<br>TGGTCTACGATTACAGAAG       | 5' flank for <i>bla</i> <sub>XD</sub> Gibson<br>assembly                    |
| oMC2000 | GGATTTTGGTGCATGAGATTATCAAAAAGGAGTTTAAACCTGCA<br>AGAGCTTCTTCCTTTAAAC       | 3' flank for <i>bla</i> <sub>XD</sub> Gibson<br>assembly                    |
| oMC2019 | CAGTCACGACGTTGTAAAACGACGGCCAGTGAATTCGTAAAG<br>CAATTATATTATGTAACCATATTA    | P <sub><i>bla</i><sub>X</sub></sub> cloning via Gibson<br>assembly          |
| oMC2020 | AAGCTTGCATGCCTGCAGGTCGACTCTAGAGGATCCTATGTC<br>GTCCTTTGAGTTTG              | P <sub><i>bla</i><sub>X</sub></sub> cloning via Gibson<br>assembly          |
| oMC2021 | CAGTCACGACGTTGTAAAACGACGGCCAGTGAATTCGAAAAA<br>CTAAACAGAAATTTAGATGTAG      | 5' <i>bla</i> <sub>D</sub> cloning via Gibson<br>assembly                   |
| oMC2022 | AAGCTTGCATGCCTGCAGGTCGACTCTAGAGGATCCAGCTAC<br>AACAAC TAGAAGAATAAC         | 5' <i>bla</i> <sub>D</sub> cloning via Gibson<br>assembly                   |
| oMC2062 | CAGTCACGACGTTGTAAAACGACGGCCAGTGAATTCCTCAC<br>AAACTGAAAGGAGGA              | <i>bla</i> <sub>X</sub> cloning via Gibson<br>assembly                      |
| oMC2110 | GCGCGGATCCGGCTACCAAATATAACACCATC                                          | <i>bla</i> <sub>IR</sub> cloning                                            |
| oMC2111 | GCGCGAATTCGAGGGAGAGTTGCCACTATTTG                                          | <i>bla</i> <sub>IR</sub> cloning                                            |
| oMC2338 | TATCCAAATAAAATTATTTTTCTTTTCATTATGTCCTCCTTTCA<br>GTTTGTGAGGTAATT           | P <sub><i>bla</i><sub>XD</sub></sub> SOE PCR to <i>bla</i> <sub>D</sub>     |
| oMC2339 | AATTACCTCACAACTGAAAGGAGGACATAATGAAAAGAAAA<br>ATAATTTTATTTGGATA            | P <sub><i>bla</i><sub>XD</sub></sub> SOE PCR to <i>bla</i> <sub>D</sub>     |
| oMC2340 | ATGCTTTCTTCCTACATAATATACTCCCATTATGTCCTCCTTTC<br>AGTTTGTGAGGTAATT          | P <sub><i>bla</i><sub>XD</sub></sub> SOE PCR to <i>bla</i> <sub>D</sub> Δ18 |
| oMC2341 | AATTACCTCACAACTGAAAGGAGGACATAATGGGAGTATATT<br>ATGTAGGAAGAAAGCAT           | P <sub><i>bla</i><sub>XD</sub></sub> SOE PCR to <i>bla</i> <sub>D</sub> Δ18 |
| oMC2342 | TACGCCAAGCTTGCATGCCTGCAGGTCGACTCTAGACTCAA<br>CTAACTTGACTTTTTAAACTTACTATTG | M120 <i>bla</i> <sub>D</sub> cloning<br>(CDM120_RS02980)                    |
| oMC2343 | ACGGCCAGTGAATTCGAGCTCGGTACCCGGGGATCCGGAGTT<br>TTGCTCTATGTAAACTCAATTTAG    | M120 <i>bla</i> <sub>D</sub> cloning<br>(CDM120_RS02980)                    |

625

626

627 **SUPPLEMENTAL FIGURE LEGENDS**

628 **Figure S1.** DNA cloning and vector details.

629

630 **Figure S2.** The putative  $\beta$ -lactamase gene, *CD0458 (CDR20291\_0399)*, is induced by  $\beta$ -  
631 **lactams.** Putative  $\beta$ -lactamase genes in strains **A)** 630 $\Delta$ *erm* and **B)** R20291 were measured for  
632 relative expression to the housekeeping gene, *rpoC*, in  $\beta$ -lactams via qRT-PCR (Cfp:  
633 cefoperazone 50  $\mu$ g/mL; Amp: ampicillin 2  $\mu$ g/mL; Ipm: imipenem 1.5  $\mu$ g/mL). mRNA levels are  
634 normalized to expression levels in BHIS alone. Columns represent the means +/- SEM from  
635 three independent replicates. Data were analyzed by one-way ANOVA with Dunnett's multiple  
636 comparisons test, compared to no antibiotic. Adjusted *P* values indicated by \* $\leq$ 0.05, \*\*\* $\leq$ 0.001.

637

638 **Figure S3.** The putative  $\beta$ -lactamase, *CDR20291\_0399*, and its upstream gene are induced  
639 **by  $\beta$ -lactams.** **A)** The putative  $\beta$ -lactamase gene *CDR20291\_0399* is 27 bp downstream of the  
640 putative membrane protein, *CDR20291\_0398*. **B)** Relative expression of each gene was  
641 measured via qRT-PCR. *C. difficile* strain 630 $\Delta$ *erm* was grown to mid-log in BHIS medium  
642 supplemented with sub-inhibitory concentrations of  $\beta$ -lactams (Cfp: cefoperazone 50  $\mu$ g/mL;  
643 Amp: ampicillin 2  $\mu$ g/mL; Ipm: imipenem 1.5  $\mu$ g/mL). mRNA levels are normalized to expression  
644 levels in BHIS alone. Columns represent the means +/- SEM from three independent replicates.  
645 Data were analyzed by one-way ANOVA with Dunnett's multiple comparisons test, compared to  
646 no antibiotic. Adjusted *P* values indicated by \* $\leq$ 0.05, \*\* $\leq$ 0.01.

647

648 **Figure S4.** *blaX* and *blaD* form the *bla* operon. **A)** PCR was performed using a forward  
649 primer (oMC1184) within *blaX* and the reverse primer (oMC1185) within *blaD* (*CD0457* and  
650 *CD0458* in 630 $\Delta$ *erm* and *CDR20291\_0398* and *CDR20291\_0399* in R20291). **B)** cDNA was  
651 created from *C. difficile* strains 630 $\Delta$ *erm* and R20291 treated with 2  $\mu$ g/mL ampicillin. gDNA:

652 genomic DNA from each strain served as a positive control; -RT: RNA from a reverse  
653 transcription reaction lacking enzyme served as a negative control.

654

655 **Figure S5. Analysis of gene expression of mutants *blaX::erm* and  $\Delta$ *blaXD*.** Relative  
656 expression of **A) *blaX*** and **B) *blaD*** in 630 $\Delta$ *erm* compared to *blaX::erm* (MC905), and  $\Delta$ *blaXD*  
657 (MC1327) was measured via qRT-PCR. *C. difficile* was grown to mid-log in BHIS media  
658 supplemented with sub-inhibitory concentrations of  $\beta$ -lactams (Cfp: cefoperazone 60  $\mu$ g/mL,  
659 Amp: ampicillin 2  $\mu$ g/mL, and Ipm: imipenem 1.5  $\mu$ g/mL). mRNA levels are normalized to  
660 expression levels in 630 $\Delta$ *erm* in BHIS alone. Columns represent the means +/- SEM from three  
661 independent replicates. Data were analyzed by one-way ANOVA with Dunnett's multiple  
662 comparisons test, compared to expression in 630 $\Delta$ *erm* without antibiotic. Adjusted *P* values  
663 indicated by \* $\leq$ 0.05, \*\*\*\* $<$ 0.0001.

664

665 **Figure S6. *blaXD* transcription is modestly induced by vancomycin and polymyxin B.**  
666 Relative expression of each gene was measured via qRT-PCR. *C. difficile* strain 630 $\Delta$ *erm* was  
667 grown to mid-log in BHIS medium supplemented with sub-inhibitory concentrations of cell wall  
668 targeting antimicrobials (Van: vancomycin 0.75  $\mu$ g/mL, PmB: polymyxin B 75  $\mu$ g/mL, Lys:  
669 lysozyme 1 mg/mL, Nis: nisin 7.5  $\mu$ g/mL, LL-37 2  $\mu$ g/mL, and Kan: kanamycin 250  $\mu$ g/mL).  
670 mRNA levels are normalized to expression levels in BHIS alone. Columns represent the means  
671 +/- SEM from four independent replicates. Data were analyzed by one-way ANOVA with  
672 Dunnett's multiple comparisons test, compared to expression in 630 $\Delta$ *erm* without antibiotic. No  
673 statistically significant values found.

674

675 **Figure S7. The *bla* operon exhibits dose dependent expression for different classes of  $\beta$ -**  
676 **lactams.** Relative expression of *blaX* and *blaD* in 630 $\Delta$ *erm* was measured using qRT-PCR. *C.*  
677 *difficile* was grown to mid-log in BHIS medium supplemented with increasing sub-inhibitory

678 concentrations of **A**) cefoperazone ( $\mu\text{g/mL}$ : 3.125, 6.25, 12.5, 25, 50), **B**) ampicillin ( $\mu\text{g/mL}$ :  
679 0.25, 0.5, 1, 1.5, 2), or **C**) imipenem ( $\mu\text{g/mL}$ : 0.125, 0.25, 0.5, 1, 1.5). mRNA levels are  
680 normalized to expression levels in 630 $\Delta\text{erm}$  in BHIS alone. Columns represent the means +/-  
681 SEM from three independent replicates. Data were analyzed by one-way ANOVA with Dunnett's  
682 multiple comparisons test, comparing to expression with lowest concentration antibiotic.  
683 Adjusted  $P$  values indicated by \* $\leq 0.05$ , \*\*\*\* $< 0.0001$ .

684

685 **Figure S8. *C. difficile* strain M120 displays  $\beta$ -lactamase activity.** **A**) Alignment of BlaD  
686 proteins from strains 630 $\Delta\text{erm}$  and M120 via SerialCloner. The blue lines indicate the signal  
687 peptides predicted by Signal-3L 2.0 (58). The black triangle represents the site of truncation in  
688 the *pblaD* $\Delta 18$  (pMC811) construct. The red boxes indicate transmembrane domains predicted  
689 by Phobius (73). **B**) Nitrocefin hydrolysis assay of *C. difficile* strains 630 $\Delta\text{erm}$  and M120. Strains  
690 were grown to mid-log in BHIS media only (a, c) or with 2  $\mu\text{g/mL}$  ampicillin (b, d). Color change  
691 from yellow to red indicates cleavage of nitrocefin.

692

693 **Figure S9. Expression of *blaX* or *blaD* from  $\Delta\text{blaXD}$  complemented strains.** qRT-PCR was  
694 performed to examine expression of **A**) *blaX* or **B**) *blaD* from a plasmid maintained in  $\Delta\text{blaXD}$   
695 (MC1327) grown to mid-log in BHIS media supplemented with 2  $\mu\text{g/mL}$  ampicillin. mRNA levels  
696 are normalized to expression levels in  $\Delta\text{blaXD}$  (MC1327) expressing an empty vector (pMC123)  
697 in BHIS alone. *pblaXD*: pMC867; *pblaD*: pMC897; *pblaD* $\Delta 18$ : pMC811. Columns represent the  
698 means +/- SEM from three independent replicates. Data were analyzed by one-way ANOVA  
699 with Dunnett's multiple comparisons test, comparing to expression without antibiotic. Absence of  
700 asterisk indicates no statistically significant difference found. Adjusted  $P$  values indicated by  
701 \* $\leq 0.05$ , \*\* $< 0.0001$ .

702

703 **Figure S10. *blaIR* is derepressed but disrupted in the *blaI::erm* strain.** **A)** *blaI* was disrupted  
704 by an insertion. qRT-PCR was performed to measure expression of **B)** *blaI* and **C)** *blaR* in *C.*  
705 *difficile* 630 $\Delta$ *erm* and *blaI::erm* strains grown to mid-log in BHIS media with or without  $\beta$ -lactam  
706 (Cfp: cefoperazone 60  $\mu$ g/mL; Amp: ampicillin 2  $\mu$ g/mL; Ipm: imipenem 1.5  $\mu$ g/mL). mRNA  
707 levels are normalized to expression levels in 630 $\Delta$ *erm* in BHIS alone. Columns represent the  
708 means  $\pm$  SEM from three independent replicates. Data were analyzed by one-way ANOVA  
709 with Dunnett's multiple comparisons test, compared to expression in 630 $\Delta$ *erm* without antibiotic.  
710 Adjusted *P* values indicated by \* $\leq$ 0.05, \*\*\*\* $<$ 0.0001.

711

## 712 SUPPLEMENTAL TABLE LEGEND

713

714 **Table S1. MIC values for 630 $\Delta$ *erm*, *blaX::erm*, and  $\Delta$ *blaXD* strains.** MIC values were  
715 determined for strains 630 $\Delta$ *erm*, *blaX::erm* (MC905), and  $\Delta$ *blaXD* (MC1327) in Cfp  
716 (cefoperazone), Amp (ampicillin), and Ipm (imipenem) using liquid broth dilution. Values  
717 represent the highest MIC value of three biological replicates.

718

719

720

721



## 722 REFERENCES

- 723 1. Hall IC, O'Toole E. 1935. Intestinal flora in new-born infants - With a description  
724 of a new pathogenic anaerobe, *Bacillus difficilis*. *American Journal of Diseases of*  
725 *Children* 49:390-402.
- 726 2. Bartlett JG, Moon N, Chang TW, Taylor N, Onderdonk AB. 1978. Role of  
727 *Clostridium-Difficile* in Antibiotic-Associated Pseudomembranous Colitis.  
728 *Gastroenterology* 75:778-782.
- 729 3. George WL, Goldstein EJC, Sutter VL, Ludwig SL, Finegold SM. 1978. Etiology  
730 of Antimicrobial-Agent-Associated Colitis. *Lancet* 1:802-803.
- 731 4. Lessa FC, Winston LG, McDonald LC, Difficil EIPC. 2015. Burden of *Clostridium*  
732 *difficile* Infection in the United States REPLY. *New England Journal of Medicine*  
733 372:2369-2370.
- 734 5. Dubberke ER, Olsen MA. 2012. Burden of *Clostridium difficile* on the Healthcare  
735 System. *Clinical Infectious Diseases* 55:S88-S92.
- 736 6. Wilson KH. 1993. The microecology of *Clostridium difficile*. *Clin Infect Dis* 16  
737 Suppl 4:S214-8.
- 738 7. Wilson KH, Silva J, Fekety FR. 1981. Suppression of *Clostridium difficile* by  
739 normal hamster cecal flora and prevention of antibiotic-associated cecitis. *Infect*  
740 *Immun* 34:626-8.
- 741 8. Spigaglia P. 2016. Recent advances in the understanding of antibiotic resistance  
742 in *Clostridium difficile* infection. *Therapeutic Advances in Infectious Disease* 3:23-  
743 42.
- 744 9. Bakken JS, Borody T, Brandt LJ, Brill JV, Demarco DC, Franzos MA, Kelly C,  
745 Khoruts A, Louie T, Martinelli LP, Moore TA, Russell G, Surawicz C, Fecal  
746 Microbiota Transplantation W. 2011. Treating *Clostridium difficile* infection with  
747 fecal microbiota transplantation. *Clin Gastroenterol Hepatol* 9:1044-9.
- 748 10. Kassam Z, Lee CH, Yuan Y, Hunt RH. 2013. Fecal microbiota transplantation for  
749 *Clostridium difficile* infection: systematic review and meta-analysis. *Am J*  
750 *Gastroenterol* 108:500-8.
- 751 11. Chow AW, Cheng N, Bartlett KH. 1985. In vitro susceptibility of *Clostridium*  
752 *difficile* to new beta-lactam and quinolone antibiotics. *Antimicrob Agents*  
753 *Chemother* 28:842-4.
- 754 12. Chachaty E, Depitre C, Mario N, Bourneix C, Saulnier P, Corthier G, Andremont  
755 A. 1992. Presence of *Clostridium difficile* and antibiotic and beta-lactamase  
756 activities in feces of volunteers treated with oral cefixime, oral cefpodoxime  
757 proxetil, or placebo. *Antimicrob Agents Chemother* 36:2009-13.
- 758 13. Hicks LA, Bartoces MG, Roberts RM, Suda KJ, Hunkler RJ, Taylor TH, Schrag  
759 SJ. 2015. US Outpatient Antibiotic Prescribing Variation According to Geography,  
760 Patient Population, and Provider Specialty in 2011. *Clinical Infectious Diseases*  
761 60:1308-1316.
- 762 14. Park JT, Strominger JL. 1957. Mode of Action of Penicillin - Biochemical Basis  
763 for the Mechanism of Action of Penicillin and for Its Selective Toxicity. *Science*  
764 125:99-101.
- 765 15. Petri WA. 2015. Penicillins, Cephalosporins, and Other  $\beta$ -Lactam Antibiotics. *In*  
766 Brunton LL, Chabner BA, Knollmann BC (ed), Goodman & Gilman's: The

- 767 Pharmacological Basis of Therapeutics, 12e. McGraw-Hill Education, New York,  
768 NY.
- 769 16. Tipper DJ, Strominger JL. 1965. Mechanism of Action of Penicillins - a Proposal  
770 Based on Their Structural Similarity to Acyl-D-Alanyl-D-Alanine. Proceedings of  
771 the National Academy of Sciences of the United States of America 54:1133-+.
- 772 17. Waxman DJ, Strominger JL. 1983. Penicillin-Binding Proteins and the  
773 Mechanism of Action of Beta-Lactam Antibiotics. Annual Review of Biochemistry  
774 52:825-869.
- 775 18. Majiduddin FK, Materon IC, Palzkill TG. 2002. Molecular analysis of beta-  
776 lactamase structure and function. International Journal of Medical Microbiology  
777 292:127-137.
- 778 19. Buchanan CE, Strominger JL. 1976. Altered Penicillin-Binding Components in  
779 Penicillin-Resistant Mutants of *Bacillus-Subtilis*. Proceedings of the National  
780 Academy of Sciences of the United States of America 73:1816-1820.
- 781 20. Gotoh N, Nunomura K, Nishino T. 1990. Resistance of *Pseudomonas-*  
782 *Aeruginosa* to Cefsulodin - Modification of Penicillin-Binding Protein-3 and  
783 Mapping of Its Chromosomal Gene. Journal of Antimicrobial Chemotherapy  
784 25:513-523.
- 785 21. Rice LB, Bellais S, Carias LL, Hutton-Thomas R, Bonomo RA, Caspers P, Page  
786 MG, Gutmann L. 2004. Impact of specific *pbp5* mutations on expression of beta-  
787 lactam resistance in *Enterococcus faecium*. Antimicrob Agents Chemother  
788 48:3028-32.
- 789 22. Poole K. 2002. Outer membranes and efflux: the path to multidrug resistance in  
790 Gram-negative bacteria. Curr Pharm Biotechnol 3:77-98.
- 791 23. Poole K. 2004. Efflux-mediated multiresistance in Gram-negative bacteria. Clin  
792 Microbiol Infect 10:12-26.
- 793 24. Sykes RB, Matthew M. 1976. The beta-lactamases of gram-negative bacteria  
794 and their role in resistance to beta-lactam antibiotics. J Antimicrob Chemother  
795 2:115-57.
- 796 25. Ciofu O, Beveridge TJ, Kadurugamuwa J, Walther-Rasmussen J, Hoiby N. 2000.  
797 Chromosomal beta-lactamase is packaged into membrane vesicles and secreted  
798 from *Pseudomonas aeruginosa*. Journal of Antimicrobial Chemotherapy 45:9-13.
- 799 26. Gonzalez LJ, Bahr G, Nakashige TG, Nolan EM, Bonomo RA, Vila AJ. 2016.  
800 Membrane anchoring stabilizes and favors secretion of New Delhi metallo-beta-  
801 lactamase. Nature Chemical Biology 12:516-+.
- 802 27. Kim SW, Park SB, Im SP, Lee JS, Jung JW, Gong TW, Lazarte JMS, Kim J, Seo  
803 JS, Kim JH, Song JW, Jung HS, Kim GJ, Lee YJ, Lim SK, Jung TS. 2018. Outer  
804 membrane vesicles from beta-lactam-resistant *Escherichia coli* enable the  
805 survival of beta-lactam-susceptible *E. coli* in the presence of beta-lactam  
806 antibiotics. Sci Rep 8:5402.
- 807 28. Fisher JF, Mobashery S. 2016. beta-Lactam Resistance Mechanisms: Gram-  
808 Positive Bacteria and *Mycobacterium tuberculosis*. Cold Spring Harb Perspect  
809 Med 6.
- 810 29. Nielsen JBK, Lampen JO. 1982. Membrane-Bound Penicillinases in Gram-  
811 Positive Bacteria. Journal of Biological Chemistry 257:4490-4495.

- 812 30. Murray BE, Mederski-Samaroj B. 1983. Transferable beta-lactamase. A new  
813 mechanism for in vitro penicillin resistance in *Streptococcus faecalis*. *J Clin*  
814 *Invest* 72:1168-71.
- 815 31. Nielsen JBK, Lampen JO. 1983. Beta-Lactamase-iii of *Bacillus-Cereus-569* -  
816 Membrane Lipoprotein and Secreted Protein. *Biochemistry* 22:4652-4656.
- 817 32. Fischetti VA, Novick RP, Ferretti JJ, Portnoy DA, Rood JJ. 2000. Gram-positive  
818 pathogens. ASM Press, American Society for Microbiology, Washington.
- 819 33. Toth M, Antunes NT, Stewart NK, Frase H, Bhattacharya M, Smith CA,  
820 Vakulenko SB. 2016. Class D beta-lactamases do exist in Gram-positive  
821 bacteria. *Nature Chemical Biology* 12:9-+.
- 822 34. Pollock MR. 1956. The Cell-Bound Penicillinase of *Bacillus-Cereus*. *Journal of*  
823 *General Microbiology* 15:154-169.
- 824 35. Sheinin R. 1959. The Localization of the Cell-Bound Penicillinase of *Bacillus-*  
825 *Cereus* in Protoplasts. *Journal of General Microbiology* 21:124-&.
- 826 36. Nielsen JBK, Caulfield MP, Lampen JO. 1981. Lipoprotein Nature of *Bacillus-*  
827 *Licheniformis* Membrane Penicillinase. *Proceedings of the National Academy of*  
828 *Sciences of the United States of America-Biological Sciences* 78:3511-3515.
- 829 37. Connolly AK, Waley SG. 1983. Characterization of the membrane beta-  
830 lactamase in *Bacillus cereus* 569/H/9. *Biochemistry* 22:4647-51.
- 831 38. East AK, Dyke KGH. 1989. Cloning and Sequence Determination of 6  
832 *Staphylococcus-Aureus* Beta-Lactamases and Their Expression in *Escherichia-*  
833 *Coli* and *Staphylococcus-Aureus*. *Journal of General Microbiology* 135:1001-  
834 1015.
- 835 39. Toth M, Stewart NK, Smith C, Vakulenko SB. 2018. Intrinsic Class D beta-  
836 Lactamases of *Clostridium difficile*. *MBio* 9.
- 837 40. Bush K. 2013. The ABCD's of beta-lactamase nomenclature. *Journal of Infection*  
838 *and Chemotherapy* 19:549-559.
- 839 41. Luria SE, Burrous JW. 1957. Hybridization between *Escherichia-Coli* and  
840 *Shigella*. *Journal of Bacteriology* 74:461-476.
- 841 42. Edwards AN, Suarez JM, McBride SM. 2013. Culturing and Maintaining  
842 *Clostridium difficile* in an Anaerobic Environment. *Jove-Journal of Visualized*  
843 *Experiments* doi:ARTN e50787
- 844 10.3791/50787.
- 845 43. Ho TD, Ellermeier CD. 2011. PrsW Is Required for Colonization, Resistance to  
846 Antimicrobial Peptides, and Expression of Extracytoplasmic Function sigma  
847 Factors in *Clostridium difficile*. *Infection and Immunity* 79:3229-3238.
- 848 44. Cartman ST, Kelly ML, Heeg D, Heap JT, Minton NP. 2012. Precise Manipulation  
849 of the *Clostridium difficile* Chromosome Reveals a Lack of Association between  
850 the *tcdC* Genotype and Toxin Production. *Applied and Environmental*  
851 *Microbiology* 78:4683-4690.
- 852 45. Dineen SS, Villapakkam AC, Nordman JT, Sonenshein AL. 2007. Repression of  
853 *Clostridium difficile* toxin gene expression by CodY. *Molecular Microbiology*  
854 66:206-219.
- 855 46. Bouillaut L, McBride SM, Sorg JA. 2011. Genetic manipulation of *Clostridium*  
856 *difficile*. *Curr Protoc Microbiol* Chapter 9:Unit 9A 2.

- 857 47. Galarneau A, Primeau M, Trudeau LE, Michnick SW. 2002. Beta-lactamase  
858 protein fragment complementation assays as in vivo and in vitro sensors of  
859 protein protein interactions. *Nat Biotechnol* 20:619-22.
- 860 48. Liu RH, Suarez JM, Weisblum B, Gellman SH, McBride SM. 2014. Synthetic  
861 Polymers Active against *Clostridium difficile* Vegetative Cell Growth and Spore  
862 Outgrowth. *Journal of the American Chemical Society* 136:14498-14504.
- 863 49. Brickman E, Beckwith J. 1975. Analysis of the regulation of *Escherichia coli*  
864 alkaline phosphatase synthesis using deletions and phi80 transducing phages. *J*  
865 *Mol Biol* 96:307-16.
- 866 50. Edwards AN, Pascual RA, Childress KO, Nawrocki KL, Woods EC, McBride SM.  
867 2015. An alkaline phosphatase reporter for use in *Clostridium difficile*. *Anaerobe*  
868 32:98-104.
- 869 51. Edwards AN, Tamayo R, McBride SM. 2016. A novel regulator controls  
870 *Clostridium difficile* sporulation, motility and toxin production. *Molecular*  
871 *Microbiology* 100:954-971.
- 872 52. Edwards AN, Nawrocki KL, McBride SM. 2014. Conserved oligopeptide  
873 permeases modulate sporulation initiation in *Clostridium difficile*. *Infect Immun*  
874 82:4276-91.
- 875 53. McBride SM, Sonenshein AL. 2011. Identification of a genetic locus responsible  
876 for antimicrobial peptide resistance in *Clostridium difficile*. *Infect Immun* 79:167-  
877 76.
- 878 54. Sebahia M, Wren BW, Mullany P, Fairweather NF, Minton N, Stabler R,  
879 Thomson NR, Roberts AP, Cerdeno-Tarraga AM, Wang HW, Holden MTG,  
880 Wright A, Churcher C, Quail MA, Baker S, Bason N, Brooks K, Chillingworth T,  
881 Cronin A, Davis P, Dowd L, Fraser A, Feltwell T, Hance Z, Holroyd S, Jagels K,  
882 Moule S, Mungall K, Price C, Rabinowitsch E, Sharp S, Simmonds M, Stevens  
883 K, Unwin L, Whithead S, Dupuy B, Dougan G, Barrell B, Parkhill J. 2006. The  
884 multidrug-resistant human pathogen *Clostridium difficile* has a highly mobile,  
885 mosaic genome. *Nature Genetics* 38:779-786.
- 886 55. Monot M, Boursaux-Eude C, Thibonnier M, Vallenet D, Moszer I, Medigue C,  
887 Martin-Verstraete I, Dupuy B. 2011. Reannotation of the genome sequence of  
888 *Clostridium difficile* strain 630. *Journal of Medical Microbiology* 60:1193-1199.
- 889 56. Clayton EM, Rea MC, Shanahan F, Quigley EM, Kiely B, Ross RP, Hill C. 2012.  
890 Carriage of *Clostridium difficile* in outpatients with irritable bowel syndrome. *J*  
891 *Med Microbiol* 61:1290-4.
- 892 57. Monot M, Eckert C, Lemire A, Hamiot A, Dubois T, Tessier C, Dumoulaud B,  
893 Hamel B, Petit A, Lalande V, Ma L, Bouchier C, Barbut F, Dupuy B. 2015.  
894 *Clostridium difficile*: New Insights into the Evolution of the Pathogenicity Locus.  
895 *Scientific Reports* 5.
- 896 58. Zhang YZ, Shen HB. 2017. Signal-3L 2.0: A Hierarchical Mixture Model for  
897 Enhancing Protein Signal Peptide Prediction by Incorporating Residue-Domain  
898 Cross-Level Features. *Journal of Chemical Information and Modeling* 57:988-  
899 999.
- 900 59. Armenteros JJA, Tsirigos KD, Sonderby CK, Petersen TN, Winther O, Brunak S,  
901 von Heijne G, Nielsen H. 2019. SignalP 5.0 improves signal peptide predictions  
902 using deep neural networks. *Nature Biotechnology* 37:420-+.

- 903 60. Zhu YF, Curran IH, Joris B, Ghuysen JM, Lampen JO. 1990. Identification of  
904 BlaR, the signal transducer for beta-lactamase production in *Bacillus*  
905 *licheniformis*, as a penicillin-binding protein with strong homology to the OXA-2  
906 beta-lactamase (class D) of *Salmonella typhimurium*. *J Bacteriol* 172:1137-41.
- 907 61. Hackbarth CJ, Chambers HF. 1993. *blal* and *blaR1* regulate beta-lactamase and  
908 PBP 2a production in methicillin-resistant *Staphylococcus aureus*. *Antimicrob*  
909 *Agents Chemother* 37:1144-9.
- 910 62. Zhang HZ, Hackbarth CJ, Chansky KM, Chambers HF. 2001. A proteolytic  
911 transmembrane signaling pathway and resistance to beta-lactams in  
912 staphylococci. *Science* 291:1962-5.
- 913 63. Golemi-Kotra D, Cha JY, Meroueh SO, Vakulenko SB, Mobashery S. 2003.  
914 Resistance to beta-lactam antibiotics and its mediation by the sensor domain of  
915 the transmembrane BlaR signaling pathway in *Staphylococcus aureus*. *J Biol*  
916 *Chem* 278:18419-25.
- 917 64. Grossman MJ, Lampen JO. 1987. Purification and DNA binding properties of the  
918 *blal* gene product, repressor for the beta-lactamase gene, *blaP*, of *Bacillus*  
919 *licheniformis*. *Nucleic Acids Res* 15:6049-62.
- 920 65. Gregory PD, Lewis RA, Curnock SP, Dyke KG. 1997. Studies of the repressor  
921 (*Blal*) of beta-lactamase synthesis in *Staphylococcus aureus*. *Mol Microbiol*  
922 24:1025-37.
- 923 66. Sala C, Haouz A, Saul FA, Miras I, Rosenkrands I, Alzari PM, Cole ST. 2009.  
924 Genome-wide regulon and crystal structure of *Blal* (Rv1846c) from  
925 *Mycobacterium tuberculosis*. *Mol Microbiol* 71:1102-16.
- 926 67. Waley SG. 1974. A spectrophotometric assay of beta-lactamase action on  
927 penicillins. *Biochem J* 139:789-90.
- 928 68. Samuni A. 1975. A direct spectrophotometric assay and determination of  
929 Michaelis constants for the beta-lactamase reaction. *Anal Biochem* 63:17-26.
- 930 69. Weinrich AE, Delbene VE. 1976. Beta-Lactamase Activity in Anaerobic Bacteria.  
931 *Antimicrobial Agents and Chemotherapy* 10:106-111.
- 932 70. Magot M. 1981. Some Properties of the *Clostridium-Butyricum* Group Beta-  
933 Lactamase. *Journal of General Microbiology* 127:113-119.
- 934 71. Nord CE, Hedberg M. 1990. Resistance to Beta-Lactam Antibiotics in Anaerobic-  
935 Bacteria. *Reviews of Infectious Diseases* 12:S231-S234.
- 936 72. Appelbaum PC, Spangler SK, Pankuch GA, Philippon A, Jacobs MR, Shiman R,  
937 Goldstein EJC, Citron DM. 1994. Characterization of a Beta-Lactamase from  
938 *Clostridium Clostridioforme*. *Journal of Antimicrobial Chemotherapy* 33:33-40.
- 939 73. Kall L, Krogh A, Sonnhammer ELL. 2007. Advantages of combined  
940 transmembrane topology and signal peptide prediction - the Phobius web server.  
941 *Nucleic Acids Research* 35:W429-W432.
- 942 74. Rahman O, Cummings SP, Harrington DJ, Sutcliffe IC. 2008. Methods for the  
943 bioinformatic identification of bacterial lipoproteins encoded in the genomes of  
944 Gram-positive bacteria. *World Journal of Microbiology & Biotechnology* 24:2377-  
945 2382.
- 946 75. Chirakul S, Norris MH, Pagdepanichkit S, Somprasong N, Randall LB, Shirley JF,  
947 Borlee BR, Lomovskaya O, Tuanyok A, Schweizer HP. 2018. Transcriptional and

- 948 post-transcriptional regulation of PenA beta-lactamase in acquired Burkholderia  
949 pseudomallei beta-lactam resistance. *Sci Rep* 8:10652.
- 950 76. Randall LB, Dobos K, Papp-Wallace KM, Bonomo RA, Schweizer HP. 2015.  
951 Membrane-Bound PenA beta-Lactamase of Burkholderia pseudomallei.  
952 *Antimicrob Agents Chemother* 60:1509-14.
- 953 77. Wust J, Hardegger U. 1983. Transferable resistance to clindamycin,  
954 erythromycin, and tetracycline in *Clostridium difficile*. *Antimicrob Agents*  
955 *Chemother* 23:784-6.
- 956 78. Hussain HA, Roberts AP, Mullany P. 2005. Generation of an erythromycin-  
957 sensitive derivative of *Clostridium difficile* strain 630 (630Deltaerm) and  
958 demonstration that the conjugative transposon Tn916DeltaE enters the genome  
959 of this strain at multiple sites. *J Med Microbiol* 54:137-41.
- 960 79. He M, Sebahia M, Lawley TD, Stabler RA, Dawson LF, Martin MJ, Holt KE,  
961 Seth-Smith HM, Quail MA, Rance R, Brooks K, Churcher C, Harris D, Bentley  
962 SD, Burrows C, Clark L, Corton C, Murray V, Rose G, Thurston S, van Tonder A,  
963 Walker D, Wren BW, Dougan G, Parkhill J. 2010. Evolutionary dynamics of  
964 *Clostridium difficile* over short and long time scales. *Proc Natl Acad Sci U S A*  
965 107:7527-32.
- 966 80. Thomas CM, Smith CA. 1987. Incompatibility group P plasmids: genetics,  
967 evolution, and use in genetic manipulation. *Annu Rev Microbiol* 41:77-101.
- 968 81. Cowardin CA, Petri WA. 2014. Host recognition of *Clostridium difficile* and the  
969 innate immune response. *Anaerobe* 30:205-209.

970

971

Figure 1

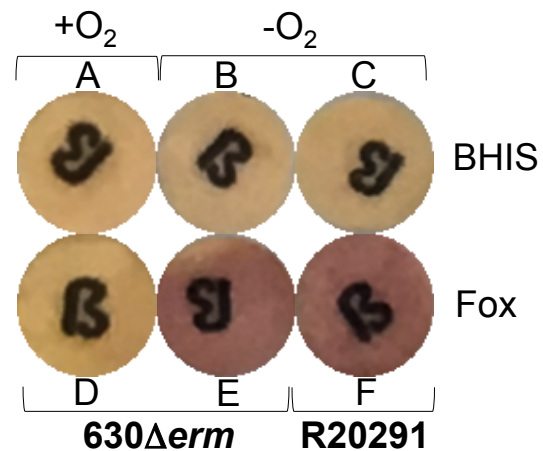

**Figure 1. *C. difficile* strains exhibit inducible, anaerobic  $\beta$ -lactamase activity.** Hydrolysis of the chromogenic cephalosporin nitrocefin was assessed for strains 630 $\Delta$ erm (A, B, D, E) and R20291 (C, F). Strains were grown for ~24 h on BHIS agar (A-C) or BHIS agar + 75  $\mu$ g/ml cefoxitin (Fox; D-F). Cells were resuspended in water and incubated aerobically (A, D) or anaerobically (B, C, E, F) on nitrocefin disks. Color change from yellow to red indicates cleavage of nitrocefin.

Figure 2

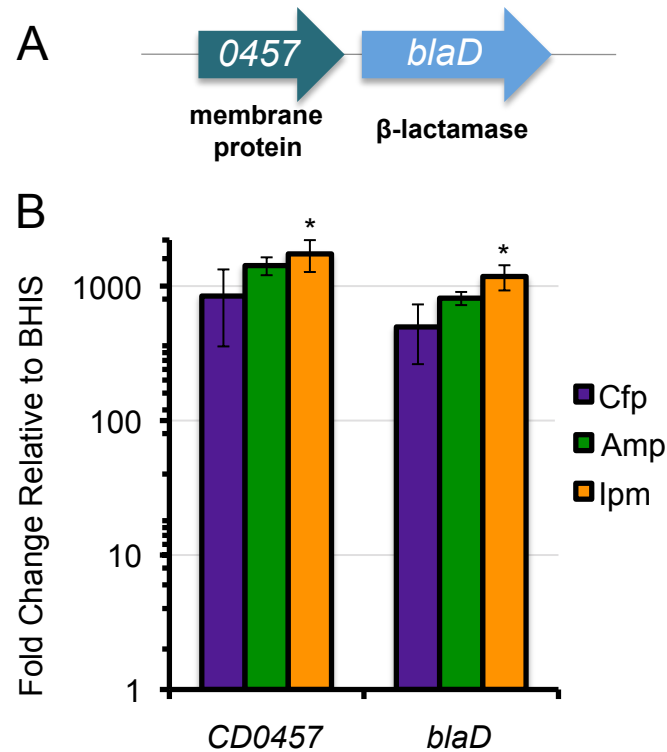

**Figure 2. The putative  $\beta$ -lactamase, *CD0458*, and the upstream gene, *CD0457* are induced by  $\beta$ -lactams. A)** The putative  $\beta$ -lactamase gene *CD0458* is 27 bp downstream of the predicted membrane protein, *CD0457*. **B)** Relative expression of each gene was measured via qRT-PCR. *C. difficile* strain 630 $\Delta$ *erm* was grown to mid-log in BHIS medium supplemented with sub-inhibitory concentrations of  $\beta$ -lactams (Cfp: cefoperazone 50  $\mu$ g/mL; Amp: ampicillin 2  $\mu$ g/mL; lpm: imipenem 1.5  $\mu$ g/mL). mRNA levels are normalized to expression levels in BHIS alone. Columns represent the means  $\pm$  SEM from three independent replicates. Data were analyzed by one-way ANOVA with Dunnett's multiple comparisons test, compared to no antibiotic. Adjusted *P* values indicated by \* $\leq$ 0.05.



Figure 3

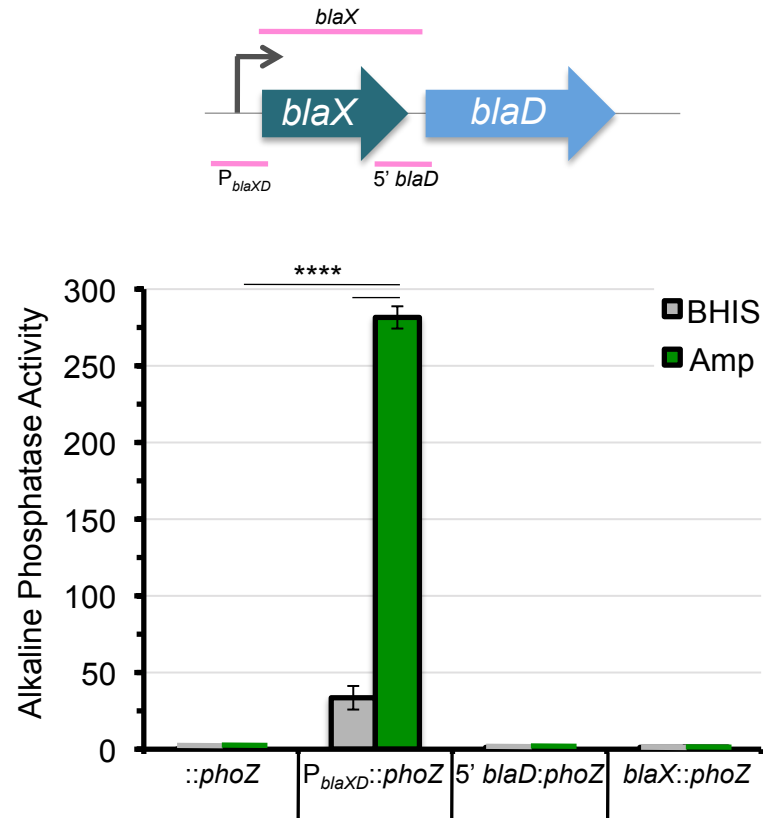

**Figure 3. Alkaline phosphatase activity from  $P_{blaXD}::phoZ$  is induced in the presence of ampicillin.** *C. difficile* 630 $\Delta erm$  cultures were grown to an  $OD_{600}$  of  $\sim 0.5$  in BHIS with 2  $\mu\text{g}/\text{mL}$  thiamphenicol for plasmid maintenance in the presence or absence of 2  $\mu\text{g}/\text{mL}$  ampicillin. Strains: MC448 (*::phoZ* - empty vector); MC1317 ( $P_{blaXD}::phoZ$ ); MC1318 ( $5' blaD::phoZ$ ); MC1369 (*blaX::phoZ*). The means and standard errors of the means of three biological replicates are shown. Data were analyzed by one-way ANOVA with Dunnett's multiple comparison test. Adjusted *P* value indicated by \*\*\*\* $<0.0001$ .

Figure 4

**Figure 4. *blaX* and *blaD* contribute to  $\beta$ -lactam resistance in *C. difficile*.** *C. difficile* strains 630 $\Delta$ *erm* (green), *blaX::erm* (MC905; pink), and  $\Delta$ *blaXD* (MC1327; blue) were grown to mid-log, backdiluted to OD 0.05, and grown in BHIS supplemented with **A**) Cfp: cefoperazone 60  $\mu$ g/mL, **B**) Amp: ampicillin 4  $\mu$ g/mL, or **C**) Ipm: imipenem 2  $\mu$ g/mL. Lines represent the means  $\pm$  SEM from four independent replicates. Data were analyzed by one-tailed paired Student's *t*-test, compared to 630 $\Delta$ *erm*. No statistically significant differences found.

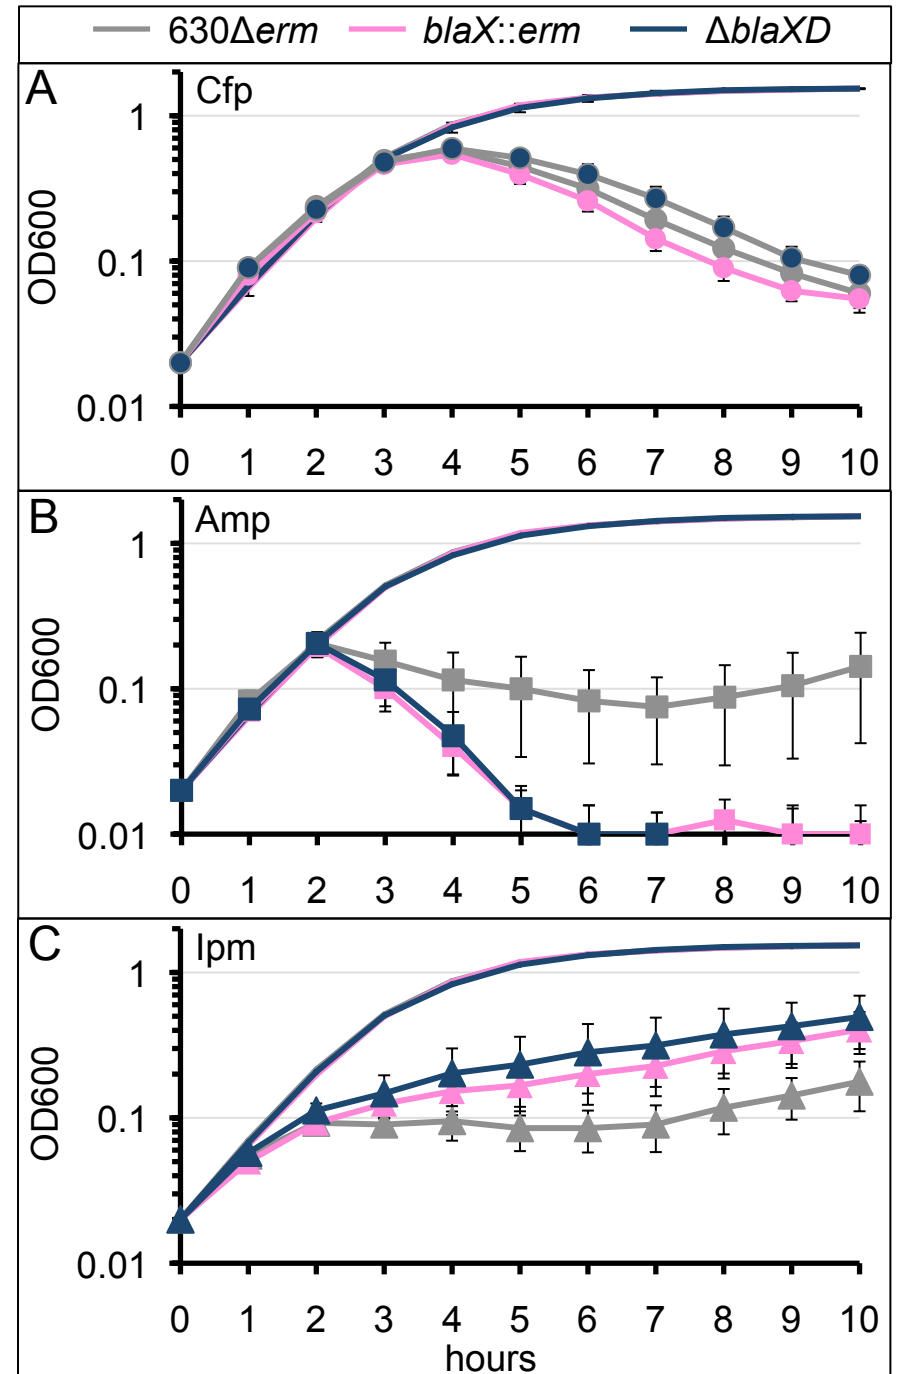

Figure 5

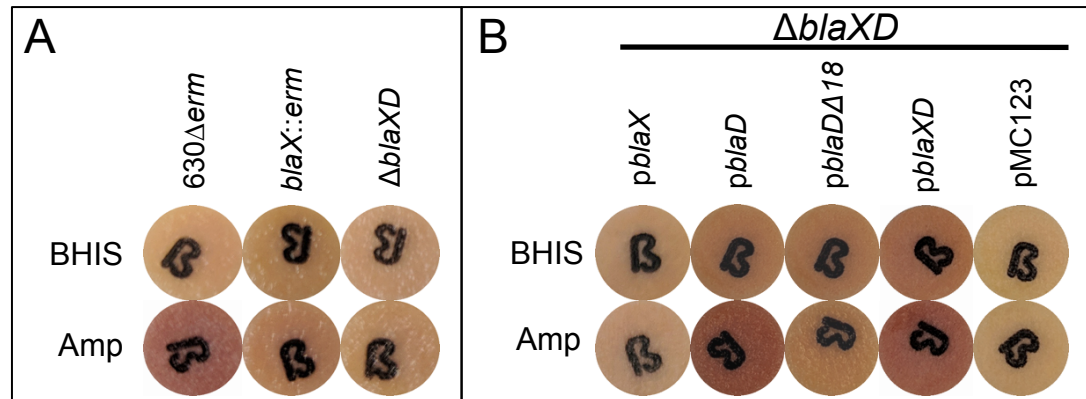

**Figure 5. The N-terminus of BlaD is necessary for  $\beta$ -lactamase secretion, independent of BlaX.** Hydrolysis of the chromogenic cephalosporin nitrocefin was assessed for **A**) strains 630 $\Delta$ erm, *blaX::erm* (MC905), and  $\Delta$ *blaXD* (MC1327) and **B**) strain  $\Delta$ *blaXD* complemented with *blaX* and/or *blaD*, expressed from their native promoter. Strains were grown anaerobically to mid-log in BHIS medium (with 2  $\mu$ g/mL thiamphenicol for plasmid maintenance in **B**) +/- 2  $\mu$ g/mL ampicillin and pelleted. Cell pellets in ~30  $\mu$ L of remaining media were incubated anaerobically on nitrocefin disks for 2 h. Color change from yellow to red indicates cleavage of nitrocefin.

Figure 6

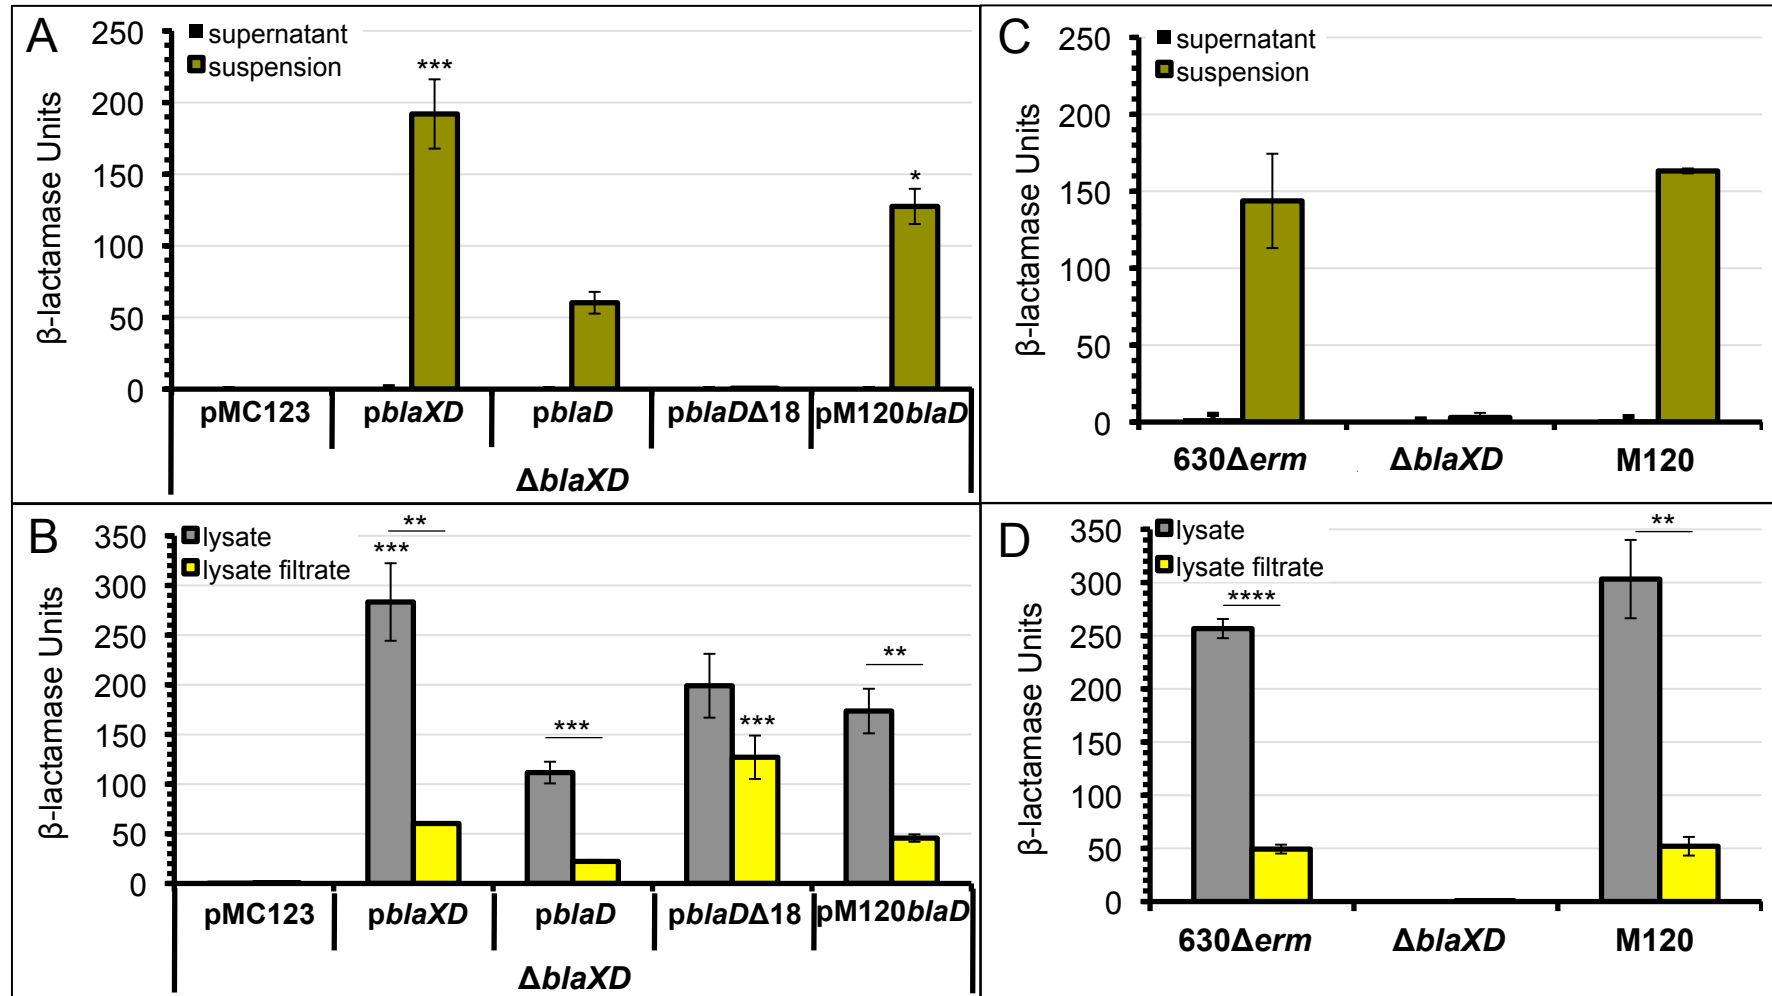

**Figure 6. BlaD utilizes a signal sequence to act at the cell membrane.**  $\Delta blaXD$  (A, B) or 630 $\Delta erm$ ,  $\Delta blaXD$ , and M120 (C, D) *C. difficile* were grown to mid-log phase in 2  $\mu\text{g}/\text{mL}$  thiamphenicol and 2  $\mu\text{g}/\text{mL}$  ampicillin and assayed for  $\beta$ -lactamase activity via a nitrocefin assay in A, C) supernatant or cell suspension and B, D) cell lysate or cell lysate filtrate.  $\Delta blaXD$  pMC123 (MC 1400);  $\Delta blaXD$   $pblaXD$  (MC1399);  $\Delta blaXD$   $pblaD$  (MC1466);  $\Delta blaXD$   $pblaD\Delta 18$  (MC1338);  $\Delta blaXD$  pM120 $blaD$  (MC1494). Columns represent the means  $\pm$  SEM from at least three independent replicates. Data were analyzed by one-way ANOVA with Dunnett's multiple comparisons test, compared to  $pblaD$  in A) and B) or 630 $\Delta erm$  in C) and D), or by a two-tailed unpaired student's *t*-test, where indicated by bars. Absence of asterisk indicates no statistically significant difference found. Adjusted *P* values indicated by \* $\leq 0.05$ , \*\*\*\* $< 0.0001$ .

Figure 7

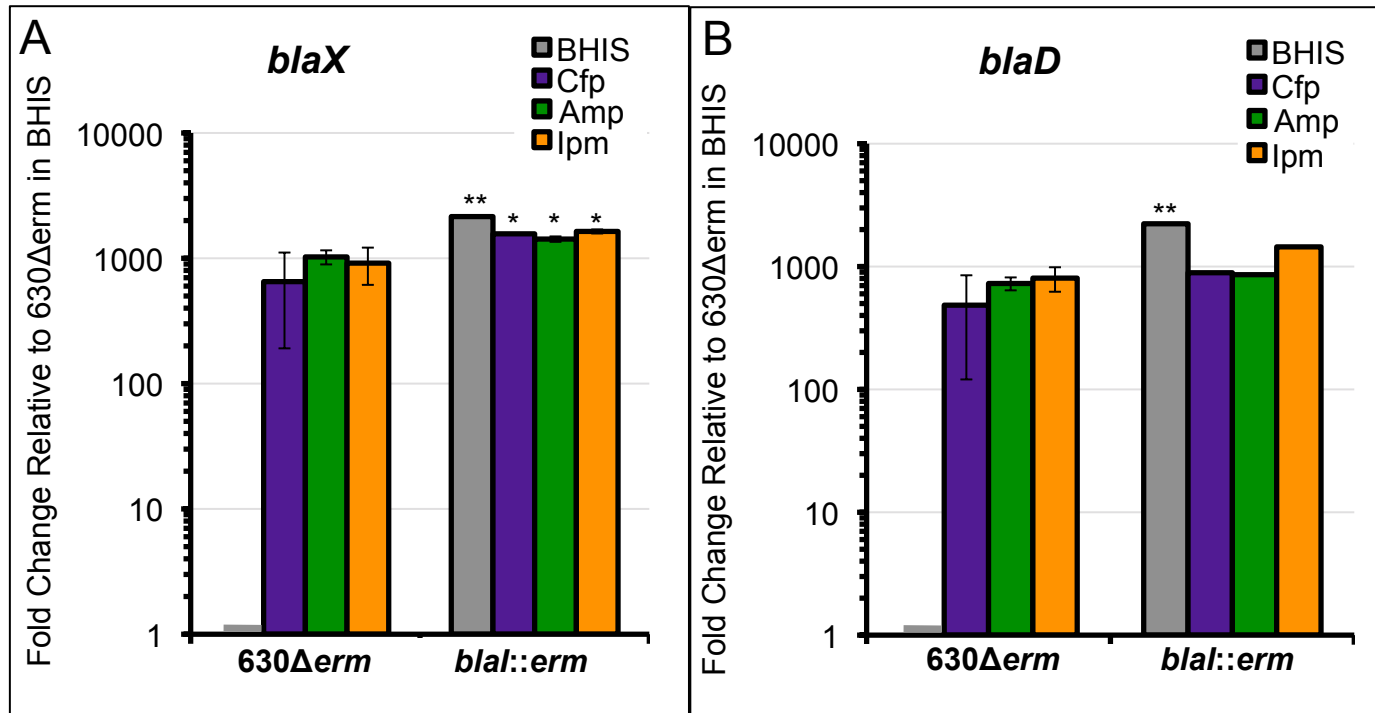

**Figure 7. *blaXD* is derepressed in the *blal::erm* strain.** qRT-PCR was performed to measure expression of **A) *blaX*** and **B) *blaD*** in *C. difficile* 630Δerm and *blal::erm* strains grown to mid-log in BHIS media with or without β-lactam (Cfp: cefoperazone 60 μg/mL; Amp: ampicillin 2 μg/mL; Ipm: imipenem 1.5 μg/mL). mRNA levels are normalized to expression levels in 630Δerm in BHIS alone. Columns represent the means +/- SEM from three independent replicates. Data were analyzed by one-way ANOVA with Dunnett's multiple comparisons test, compared to expression in 630Δerm without antibiotic. Adjusted *P* values indicated by \*≤0.05, \*\*≤0.005.

Figure 8

**Figure 8. *blaI* grants resistance to ampicillin.** *C. difficile* strains 630 $\Delta$ *erm* (gray) and *blaI::erm* (MC985; red) were grown to mid-log, backdiluted to OD 0.05, and grown in BHIS (no marker) or BHIS supplemented (filled marker) with **A**) 60  $\mu$ g/mL cefoperazone (Cfp), **B**) 4  $\mu$ g/mL ampicillin (Amp), or **C**) 2  $\mu$ g/mL imipenem (Ipm). Lines represent the means  $\pm$  SEM from three independent replicates. Data were analyzed by one-tailed paired Student's *t*-test, compared to 630 $\Delta$ *erm*. Adjusted *P* values indicated by \* $\leq$ 0.05.

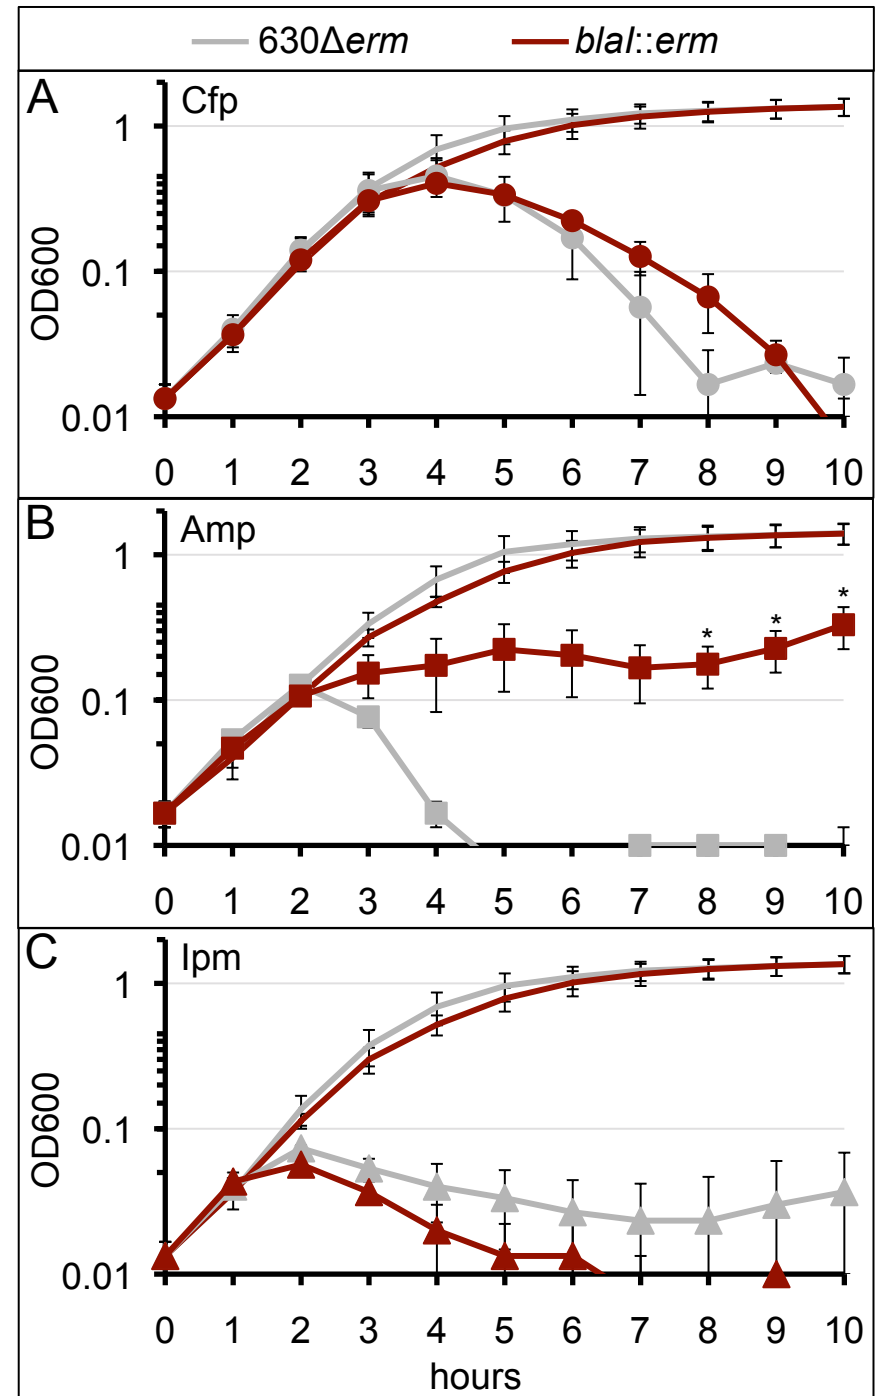

Source: https://www.biorxiv.org/content/10.1101/630020.full.pdf
